# Supplementary material for: The effect of cooling process on the structure and charge/discharge capacities of Li-rich solid-solution layered oxide cathode materials for the Li-ion battery
Source: Royal Society of Chemistry journal article supplement (doi:10.1039/d0ra06680j), 2021-01-01
Supplement: d0ra06680j1.pdf [file d0ra06680j1.pdf]

# Supporting Information

**Effect of the Cooling Process on the Structure and  
Charge/Discharge Capacities of Li-rich Solid-Solution Layered  
Oxide Cathode Materials for Li-Ion Battery**

Fumihiko Nomura <sup>a</sup>, Tatsuya Watanabe <sup>a</sup>, Hiroya Ochiai <sup>a</sup>, Takao Gunji <sup>a, b</sup>,  
Takeshi Hagiwara <sup>b</sup>, Jianfei Wu <sup>c</sup>, Futoshi Matsumoto <sup>a, b \*</sup>

<sup>a</sup>Department of Materials and Life Chemistry, Kanagawa University, 3-27-1,  
Rokkakubashi, Kanagawa-ku, Yokohama, Kanagawa 221-8686, Japan

<sup>b</sup> Research Institute for Engineering, Kanagawa University,  
3-27-1, Rokkakubashi, Kanagawa-ku, Yokohama, Kanagawa 221-8686, Japan

<sup>c</sup> Qingdao Industrial Energy Storage Research Institute, Qingdao Institute of Bioenergy  
and Bioprocess Technology, Chinese Academy of Sciences, No. 189  
Songling Road, 266101 Qingdao, China

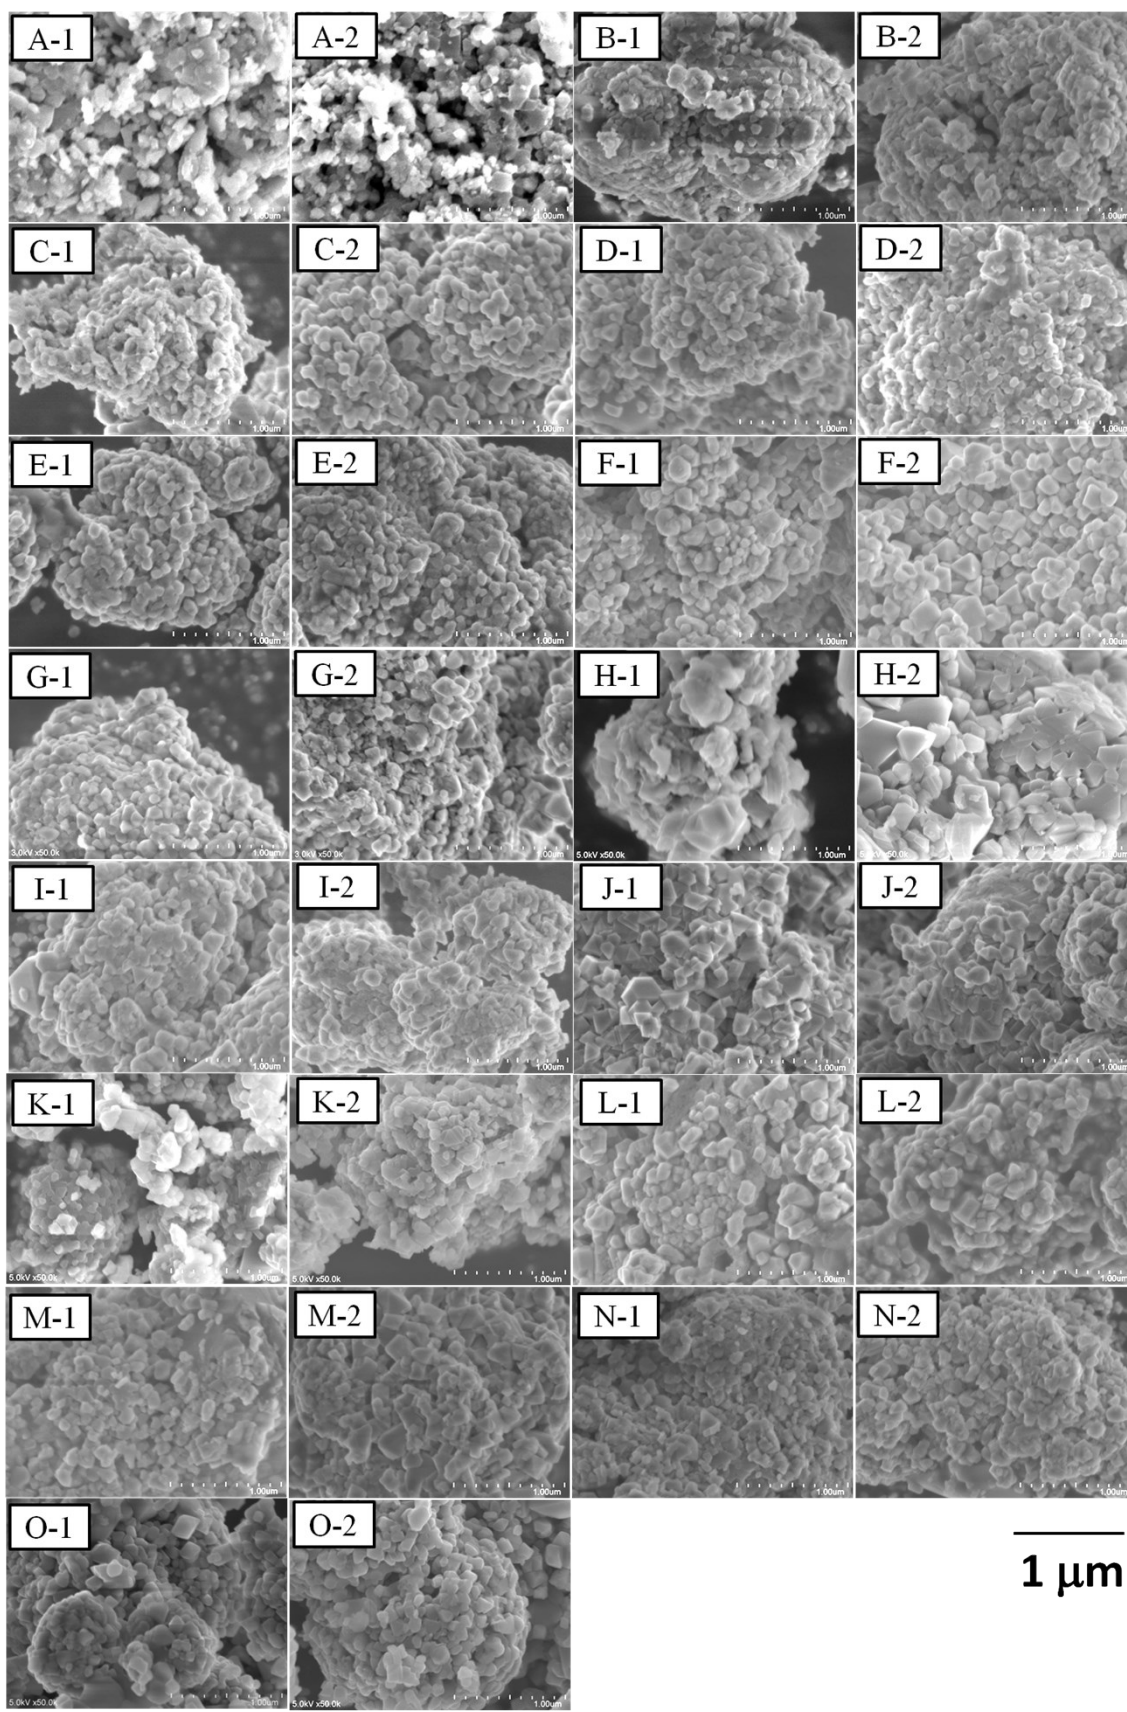

**Fig. S1** SEM images of the LLO samples prepared by (A-1, B-1, C-1, D-1, E-1, F-1, G-1, H-1, I-1, J-1, K-1, L-1, M-1, N-1 and O-1) quenched cooling with liquid nitrogen and (A-2, B-2, C-2, D-2, E-2, F-2, G-2, H-2, I-2, J-2, K-2, L-2, M-2, N-2 and O-2) slow cooling of the calcined material at a controlled rate of 25 °C h<sup>-1</sup> in the furnace from 900 to 25°C. (A) Li<sub>1.23</sub>Ni<sub>0.14</sub>Mn<sub>0.61</sub>Co<sub>0.02</sub>O<sub>2</sub> (sample 2), (B) Li<sub>1.17</sub>Ni<sub>0.22</sub>Mn<sub>0.56</sub>Co<sub>0.05</sub>O<sub>2</sub> (sample 4), (C) Li<sub>1.1</sub>Ni<sub>0.31</sub>Mn<sub>0.51</sub>Co<sub>0.08</sub>O<sub>2</sub> (sample 6), (D) Li<sub>1.07</sub>Ni<sub>0.35</sub>Mn<sub>0.48</sub>Co<sub>0.1</sub>O<sub>2</sub> (sample 7), (E) Li<sub>1.03</sub>Ni<sub>0.39</sub>Mn<sub>0.46</sub>Co<sub>0.12</sub>O<sub>2</sub> (sample 8), (F) Li<sub>1.2</sub>Ni<sub>0.16</sub>Mn<sub>0.57</sub>Co<sub>0.07</sub>O<sub>2</sub> (sample 11), (G) Li<sub>1.2</sub>Ni<sub>0.15</sub>Mn<sub>0.55</sub>Co<sub>0.1</sub>O<sub>2</sub> (sample 12), (H) Li<sub>1.27</sub>Ni<sub>0.1</sub>Mn<sub>0.63</sub>O<sub>2</sub> (sample 14), (I) Li<sub>1.23</sub>Ni<sub>0.14</sub>Mn<sub>0.61</sub>Co<sub>0.02</sub>O<sub>2</sub> (sample 15), (J) Li<sub>1.17</sub>Ni<sub>0.22</sub>Mn<sub>0.56</sub>Co<sub>0.05</sub>O<sub>2</sub> (sample 16), (K) Li<sub>1.2</sub>Ni<sub>0.27</sub>Mn<sub>0.53</sub>Co<sub>0.07</sub>O<sub>2</sub> (sample 17), (L) Li<sub>1.2</sub>Ni<sub>0.31</sub>Mn<sub>0.51</sub>Co<sub>0.08</sub>O<sub>2</sub> (sample 18), (M) Li<sub>1.07</sub>Ni<sub>0.35</sub>Mn<sub>0.48</sub>Co<sub>0.1</sub>O<sub>2</sub> (sample 19), (N) Li<sub>1.03</sub>Ni<sub>0.39</sub>Mn<sub>0.46</sub>Co<sub>0.12</sub>O<sub>2</sub> (sample 20) and (O) Li<sub>1</sub>Ni<sub>0.43</sub>Mn<sub>0.43</sub>Co<sub>0.14</sub>O<sub>2</sub> (sample 21).

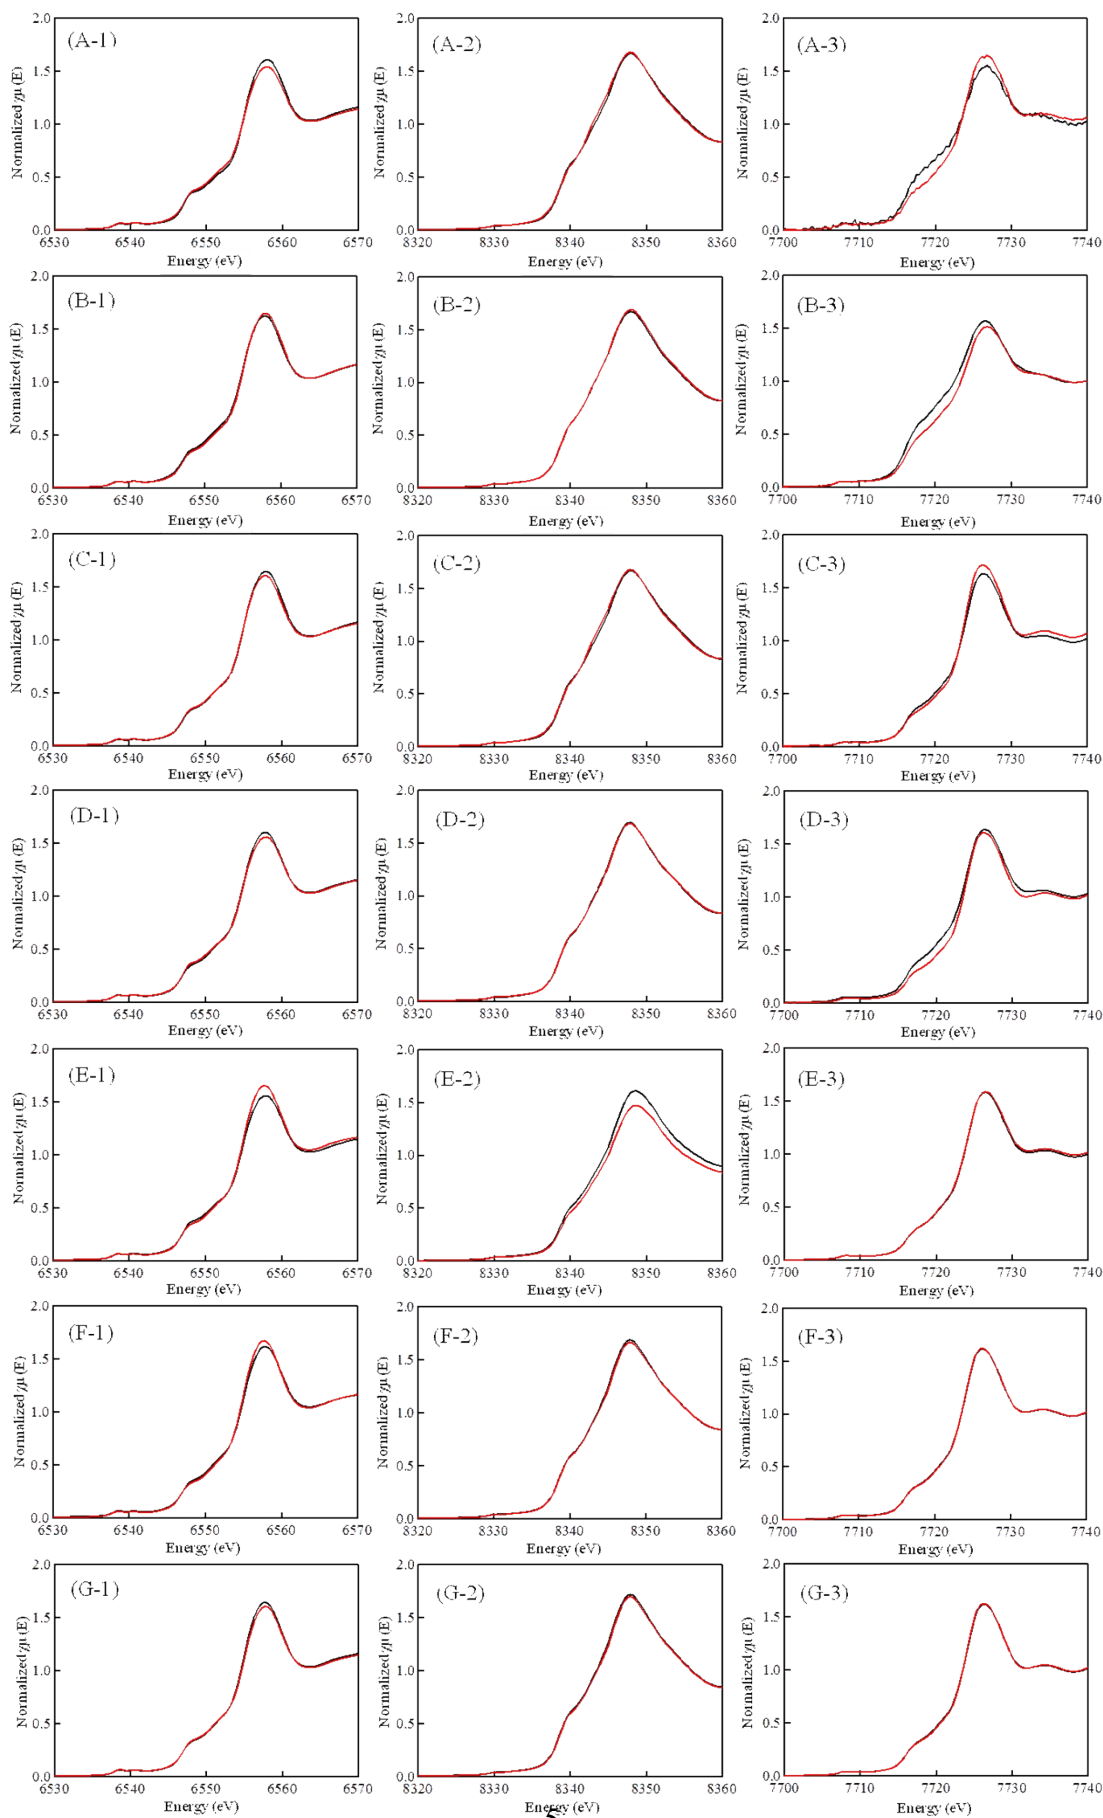

**Fig. S2** K-edge XANES spectra of (A-1, ···, G-1) Mn, (A-2, ···, G-2) Ni and (A-3, ···, G-3) Co ions of the samples 2 (A), 3 (B), 4 (C), 5 (D), 6 (E), 7 (F) and 8 (G) prepared by the quenched cooling with liquid nitrogen (black line) and the slow cooling in the furnace at a controlled cooling rate of 25 °C h<sup>-1</sup>(red line).

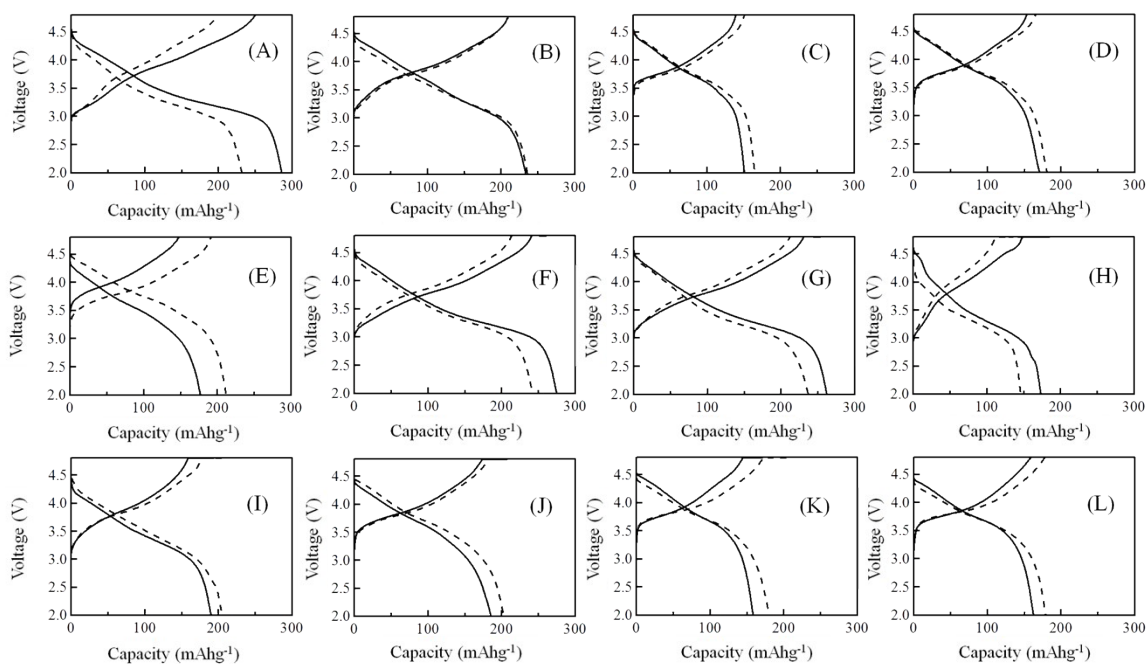

**Fig. S3** Charging/discharging voltage-capacity curves obtained at the 10<sup>th</sup> cycle with samples 2 (A), 4 (B), 6 (C), 7 (D), 8 (E), 11 (F), 12 (G), 15 (H), 16 (I), 18 (J), 19 (K), and 20 (L) prepared by the quenched cooling with liquid nitrogen (solid lines) and the slow cooling in the furnace at a controlled rate of 25 °C h<sup>-1</sup> (dotted lines). The charging/discharging rate was 0.1 C.

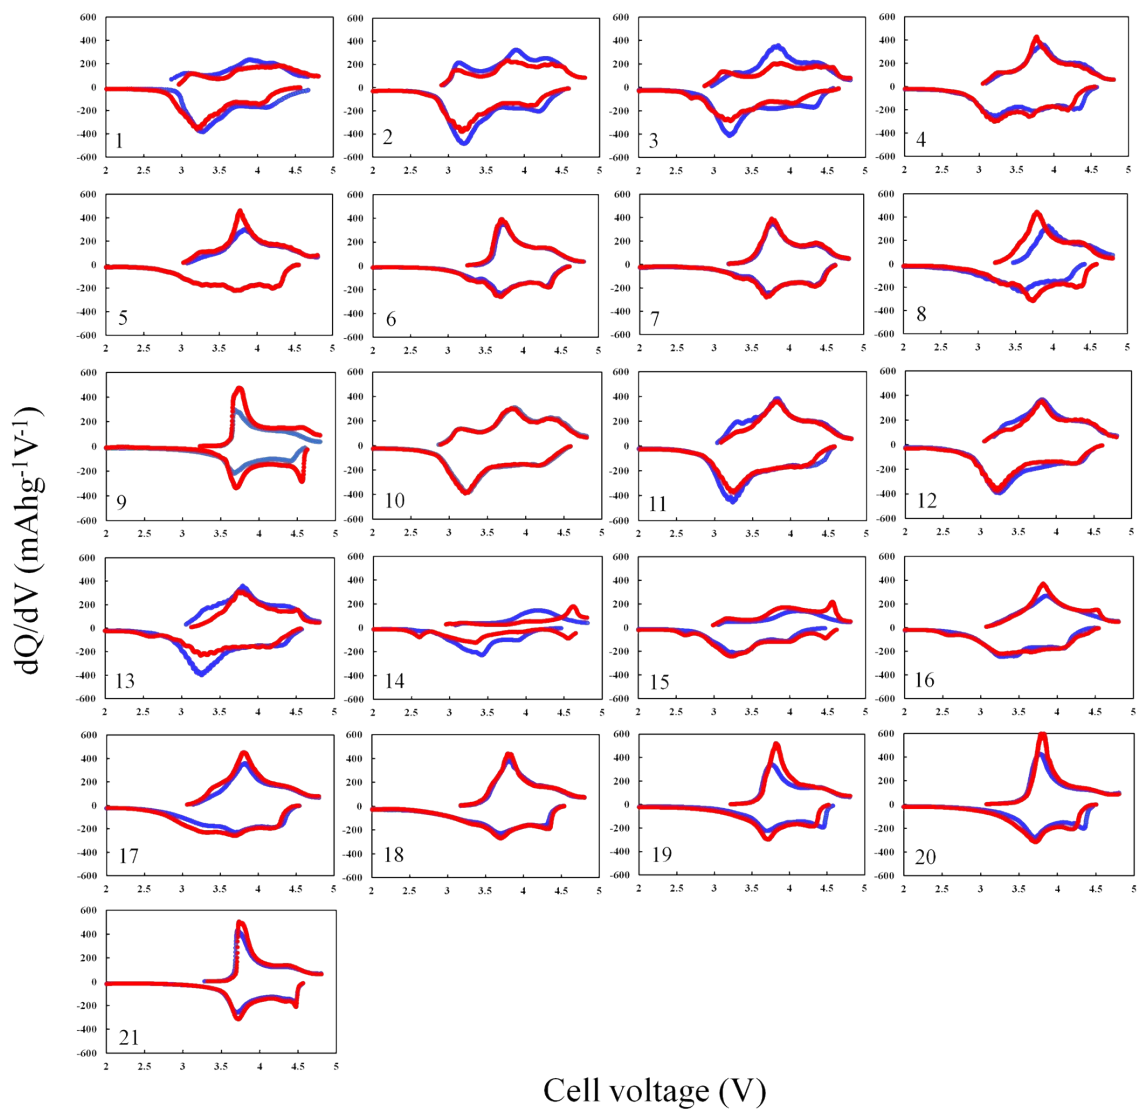

**Fig. S4**  $dQ/dV$  vs. cell voltage curves obtained from charging/discharging curves at the 10<sup>th</sup> cycle. Blue and red curves correspond to the samples prepared by the quenched cooling and slow cooling processes, respectively. The number in each figure indicates the corresponding sample number in Table 1



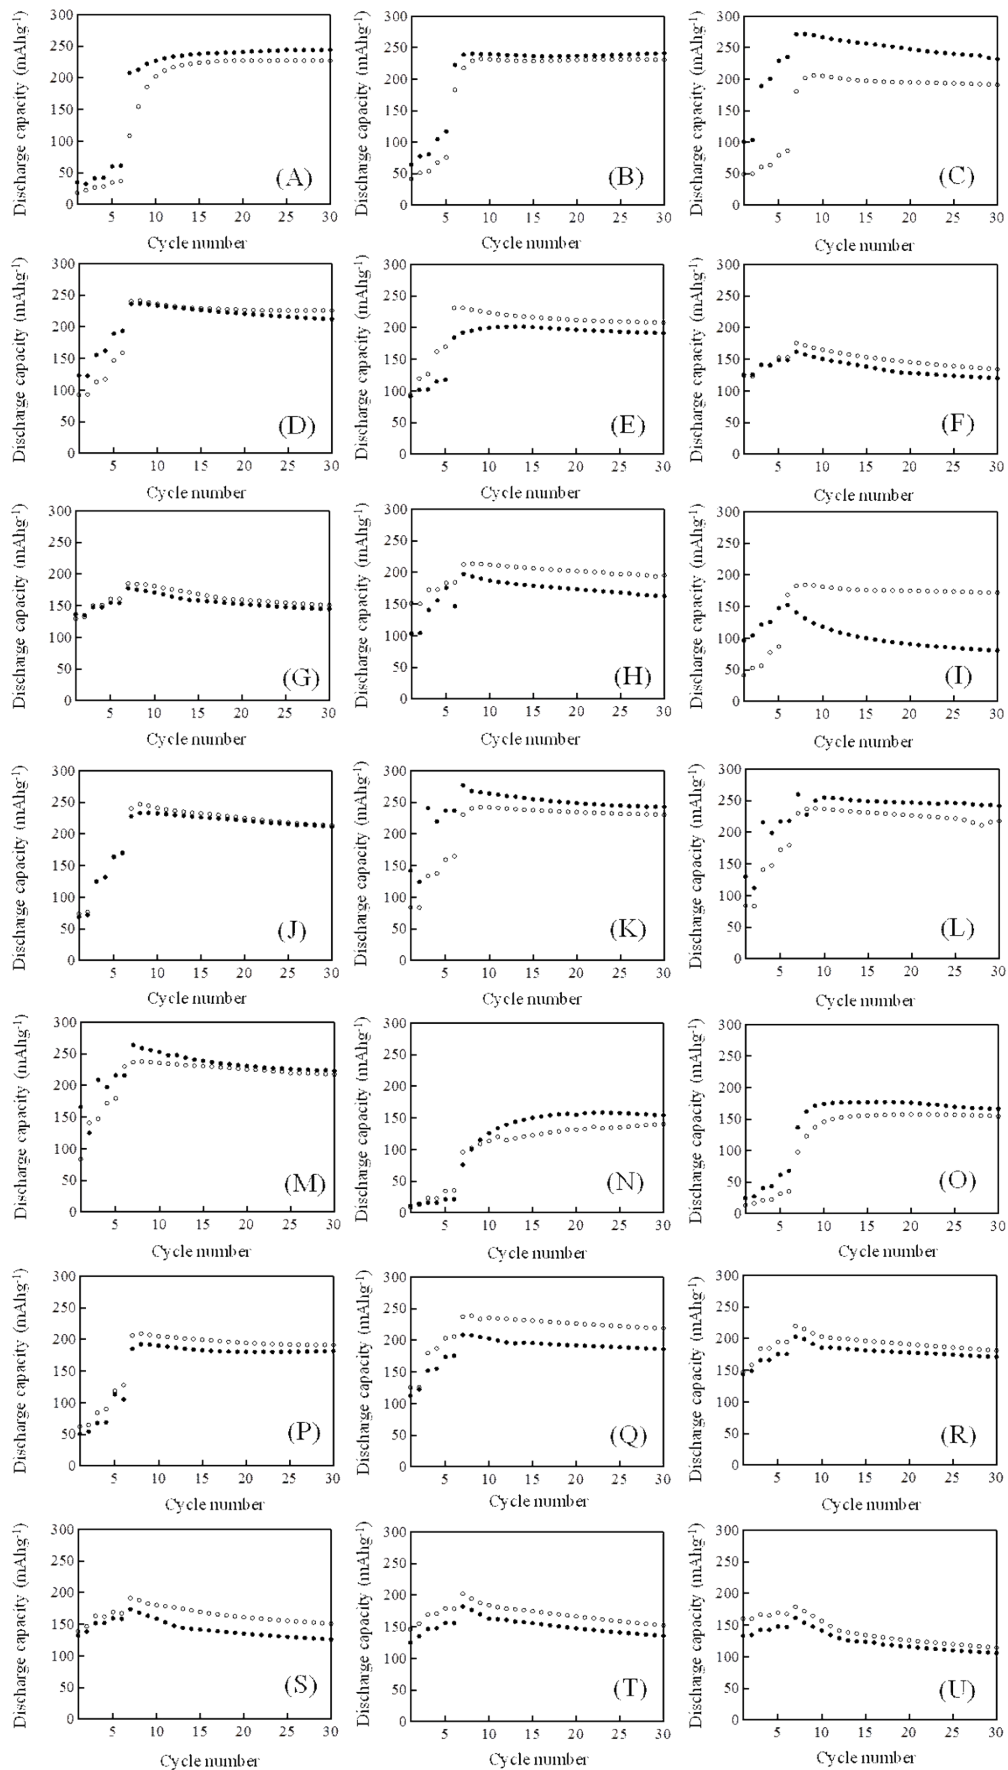

**Fig. S5** Charging/discharging cycle performance obtained at a charging/discharging current density of 0.1 C-rate for the LLO samples prepared by (●) the quenched cooling with liquid nitrogen and (○) the slow cooling in the furnace at a controlled rate of 25 °C h<sup>-1</sup>. Samples: 1 (A), 2 (B), 3 (C), 4 (D), 5 (E), 6 (F), 7 (G), 8 (H), 9 (I), 10 (J), 11 (K), 12 (L), 13 (M), 14 (N), 15 (O), 16 (P), 17 (Q), 18 (R), 19 (S), 20 (T) and 21 (U).

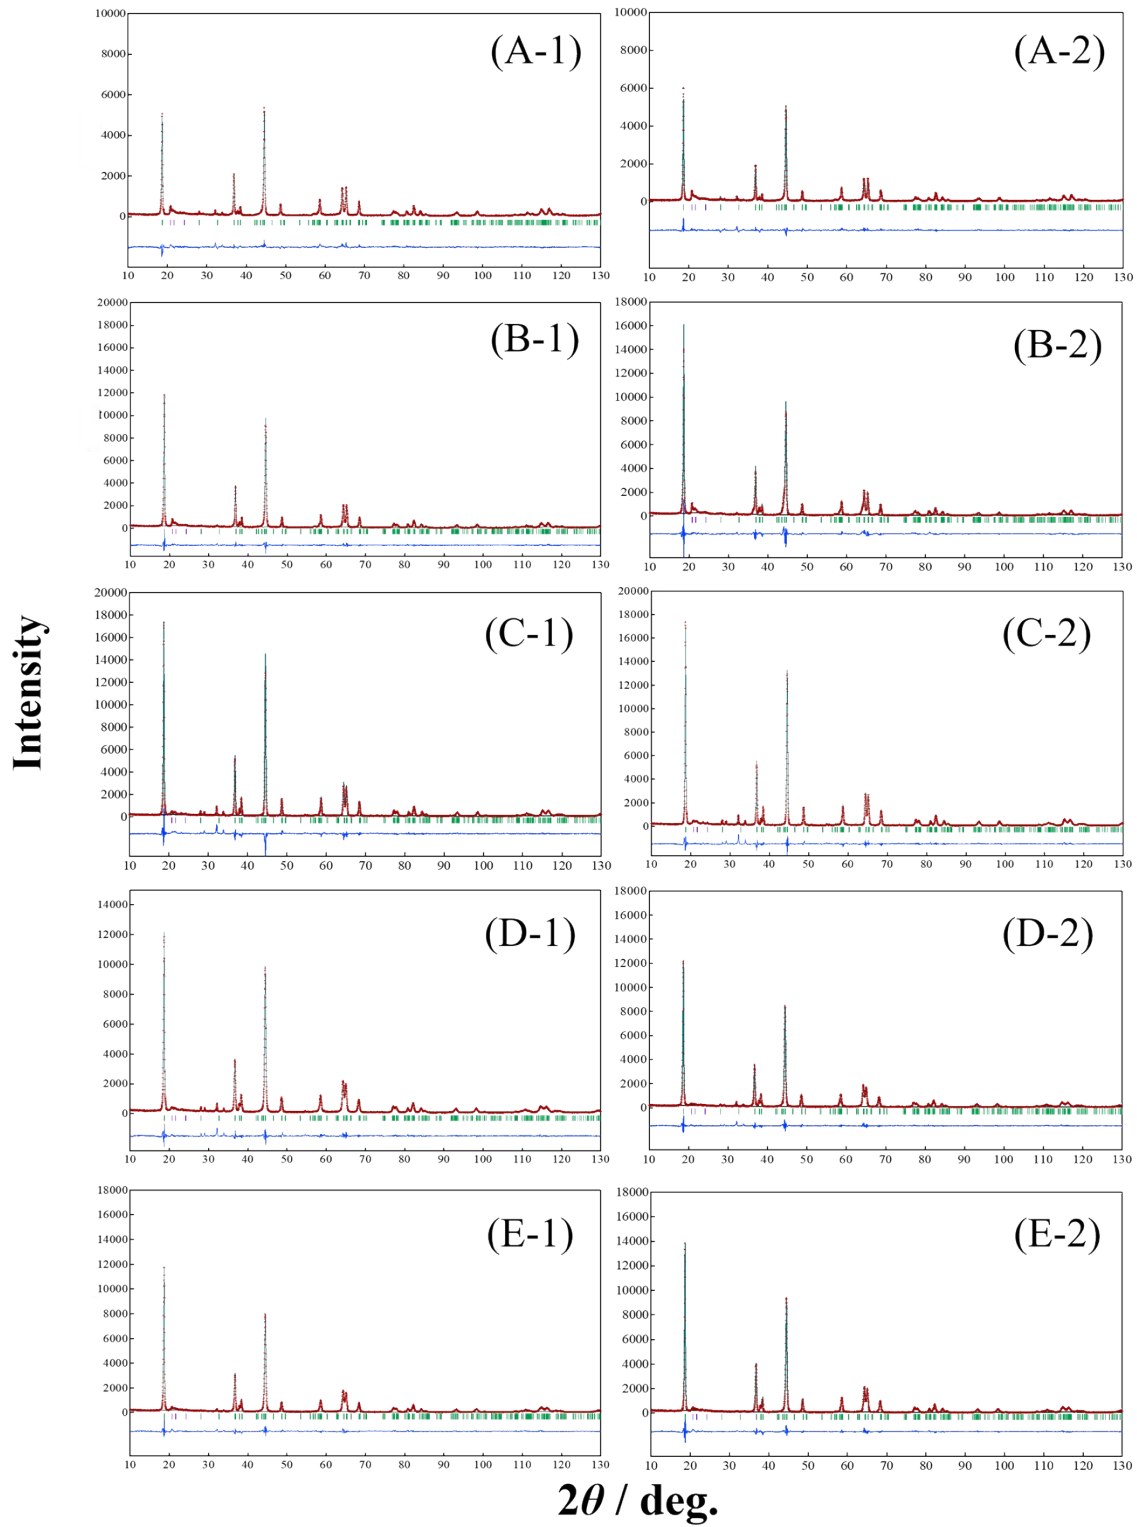

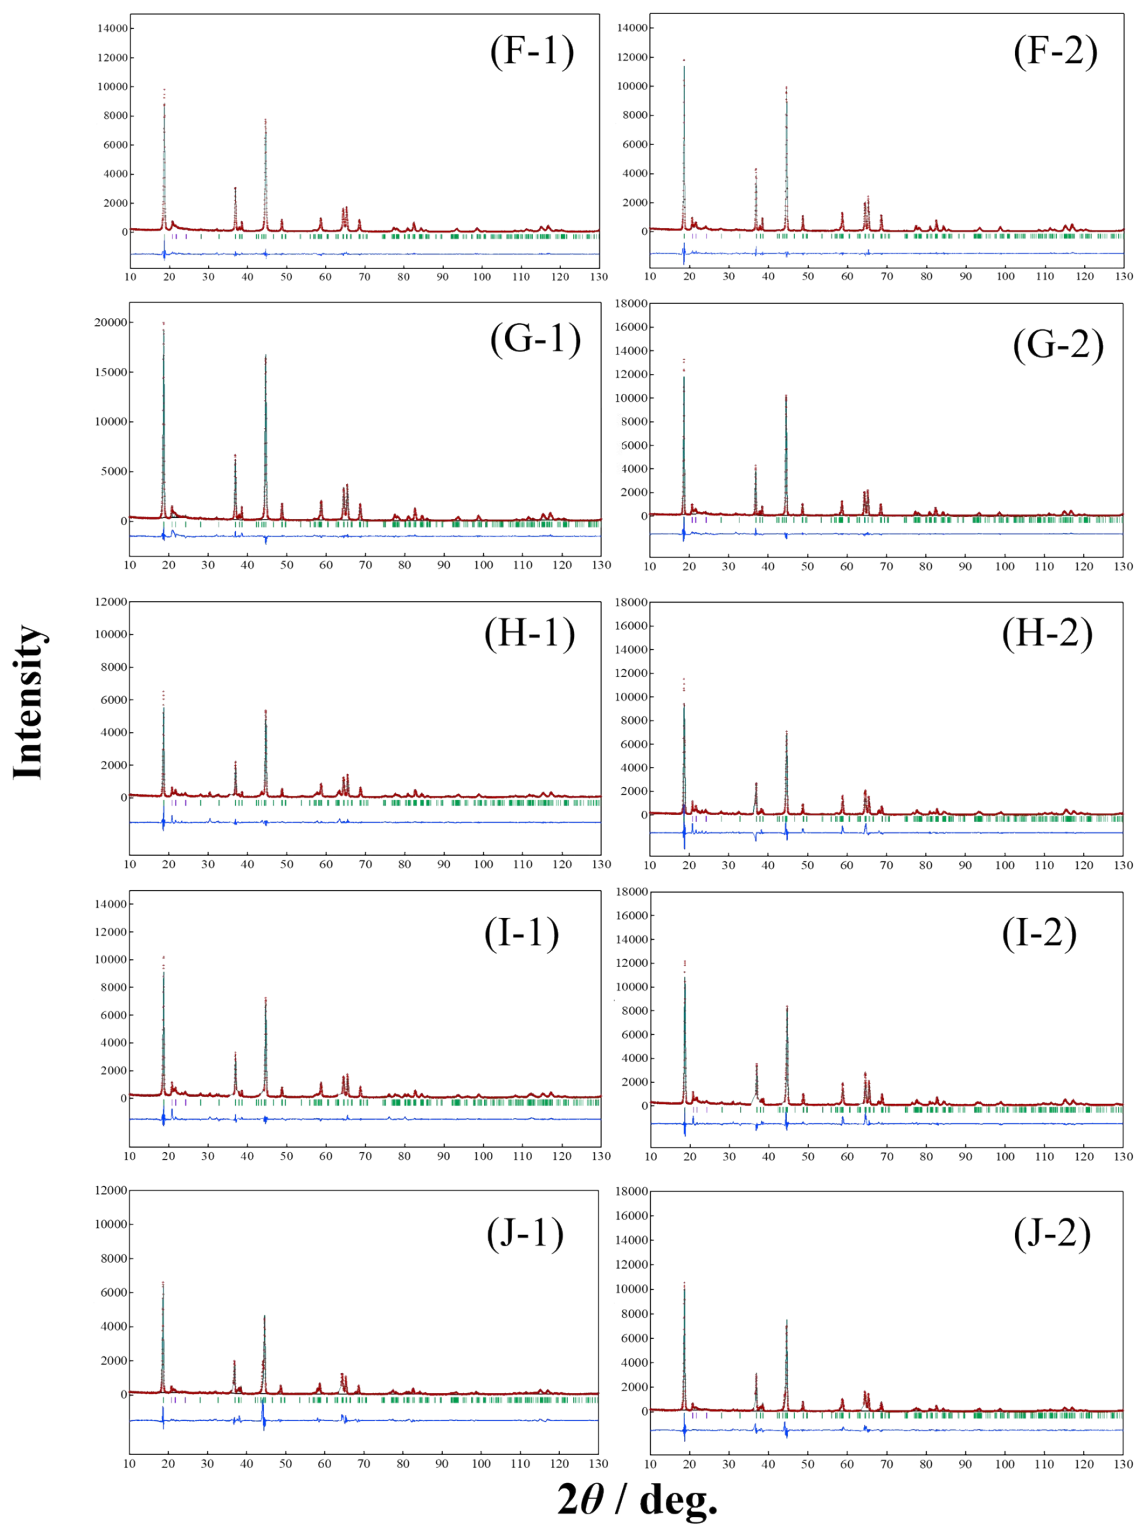

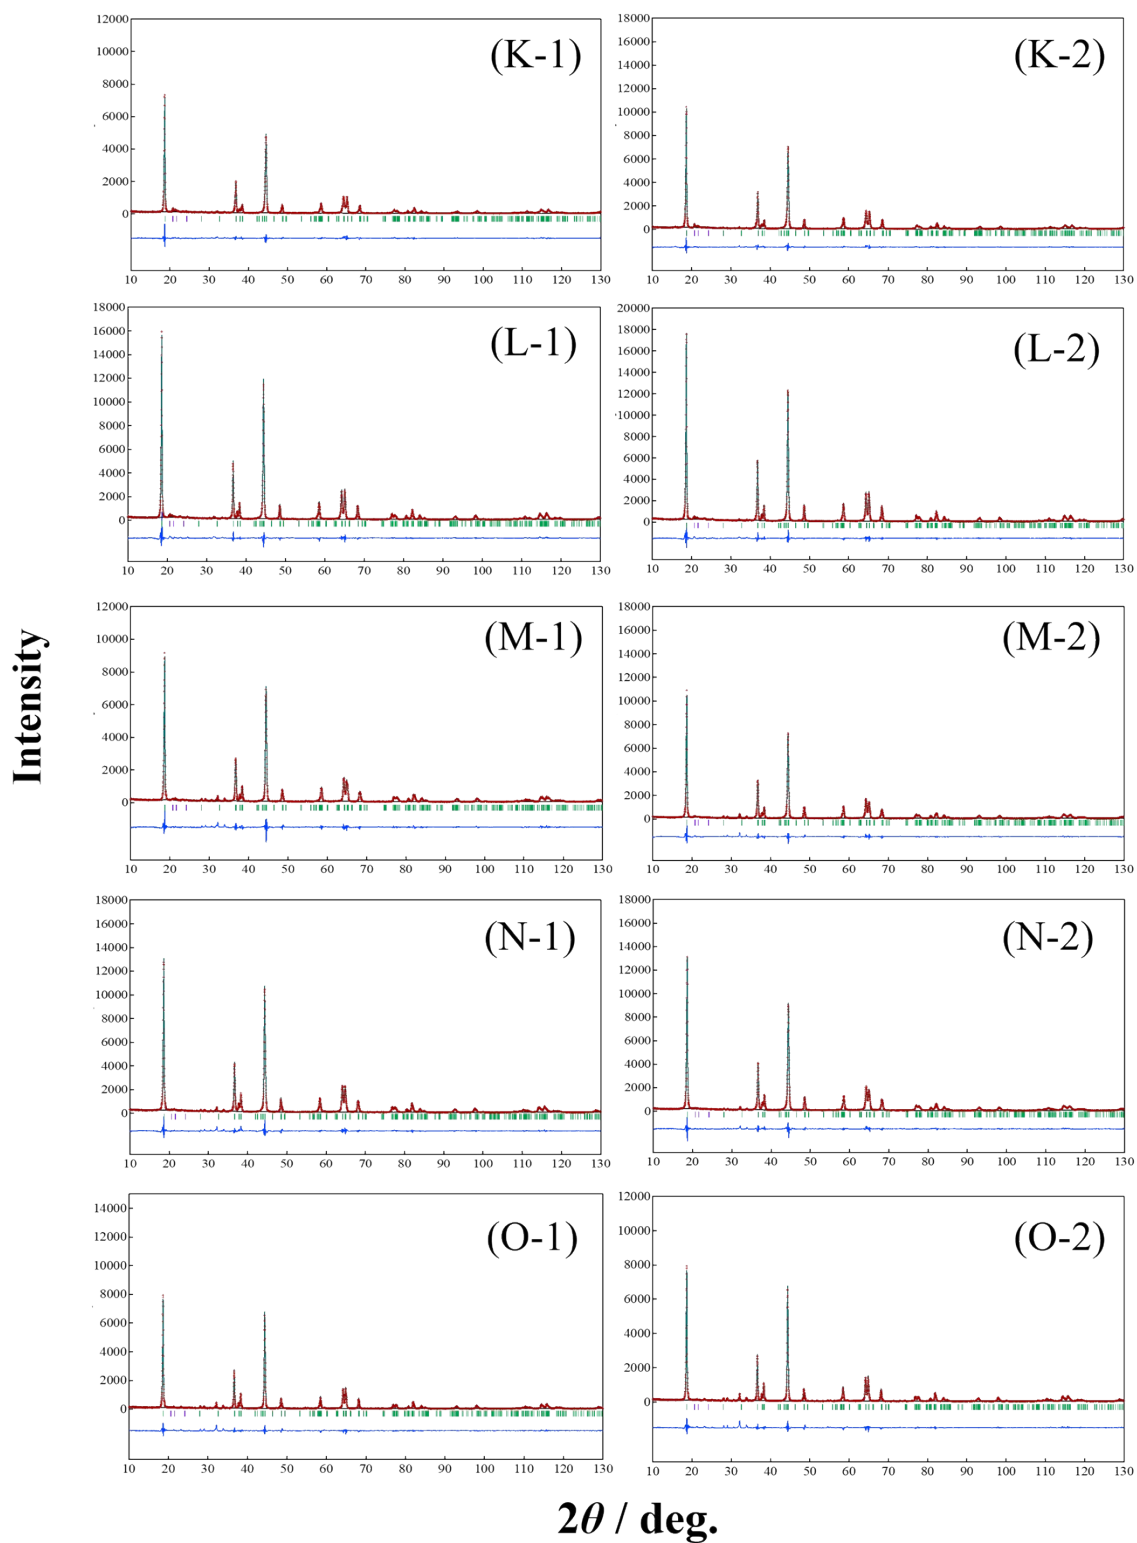

**Fig. S6** XRD Rietveld refinement profiles of samples prepared by (1) the quenched cooling with liquid nitrogen and (2) slow cooling in the furnace at a controlled rate of 25

$^{\circ}\text{C h}^{-1}$ . ( ) observed, ( ) calculated, ( ) the residual difference of both. The green vertical marks indicate the position of the Bragg reflections. \* is the peaks approximately  $20\text{-}25^{\circ}$  that result from ordering of  $\text{Li}^{+}$  ions in the transition metal layers. Samples 2 (A), 4 (B), 6 (C), 7 (D), 8 (E), 11 (F), 12 (G), 14 (H), 15 (I), 16 (J), 17 (K), 18 (L), 19 (M), 20 (N) and 21 (O).

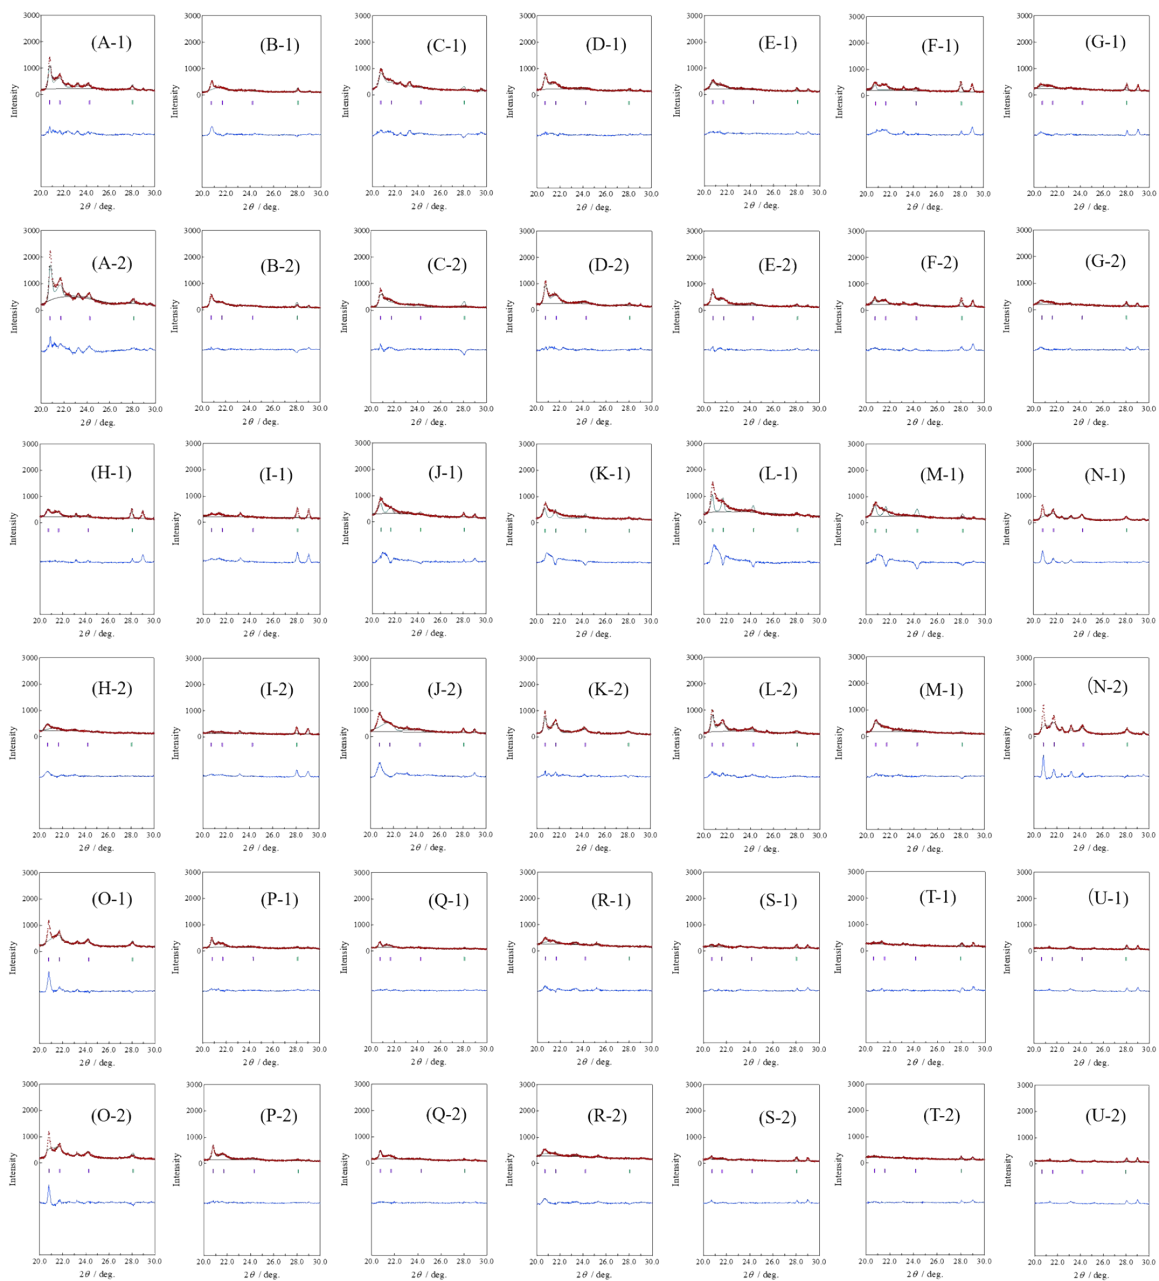

**Fig. S7** XRD Rietveld refinement profiles from 20 to 30° of the LLO samples prepared by (1) the quenched cooling with liquid nitrogen and (2) the slow cooling in the furnace at a controlled rate of 25 °C h<sup>-1</sup>. ( ) observed, ( ) calculated, ( ) the difference of both. The vertical marks indicate the position of the Bragg reflections. (A) sample 1, (B) sample 2, (C) sample 3, (D) sample 4, (E) sample 5, (F) sample 6, (G) sample 7, (H)

sample 8, (I) sample 9, (J) sample 10, (K) sample 11, (L) sample 12, (M) sample 13, (N) sample 14, (O) sample 15, (P) sample 16, (Q) sample 17, (R) sample 18, (S) sample 19,(T) sample 20 and (U) sample 21.



**Table S1** Summary of the bulk and surface atomic ratios of Mn, Ni and Co in LLO samples. Nos. 1-21 were prepared with the quenched cooling and slow cooling processes, which were evaluated with XRF and XPS, respectively, and the difference in the surface and bulk atomic percentages ratios and the difference in atomic percentages of samples prepared by quenched cooling and slow cooling processes.

| Sample No. | Bulk atomic ratios (A) |      |      |                    |      |      | Surface atomic ratios (B) |      |      |                    |      |      |
|------------|------------------------|------|------|--------------------|------|------|---------------------------|------|------|--------------------|------|------|
|            | Quenched sample        |      |      | Slow cooled sample |      |      | Quenched sample           |      |      | Slow cooled sample |      |      |
|            | Mn                     | Co   | Ni   | Mn                 | Co   | Ni   | Mn                        | Co   | Ni   | Mn                 | Co   | Ni   |
| 1          | 0.86                   | 0.00 | 0.14 | 0.86               | 0.00 | 0.14 | 0.53                      | 0.00 | 0.47 | 0.40               | 0.00 | 0.60 |
| 2          | 0.79                   | 0.02 | 0.19 | 0.79               | 0.02 | 0.19 | 0.52                      | 0.03 | 0.45 | 0.42               | 0.01 | 0.56 |
| 3          | 0.74                   | 0.04 | 0.22 | 0.73               | 0.04 | 0.23 | 0.41                      | 0.18 | 0.42 | 0.31               | 0.19 | 0.50 |
| 4          | 0.67                   | 0.06 | 0.27 | 0.67               | 0.06 | 0.27 | 0.44                      | 0.05 | 0.51 | 0.35               | 0.14 | 0.52 |
| 5          | 0.62                   | 0.08 | 0.30 | 0.62               | 0.08 | 0.31 | 0.30                      | 0.11 | 0.59 | 0.22               | 0.13 | 0.65 |
| 6          | 0.56                   | 0.09 | 0.34 | 0.56               | 0.09 | 0.34 | 0.38                      | 0.08 | 0.54 | 0.30               | 0.08 | 0.63 |
| 7          | 0.51                   | 0.11 | 0.38 | 0.51               | 0.11 | 0.38 | 0.40                      | 0.06 | 0.55 | 0.31               | 0.09 | 0.60 |
| 8          | 0.46                   | 0.13 | 0.41 | 0.47               | 0.13 | 0.40 | 0.38                      | 0.08 | 0.54 | 0.38               | 0.07 | 0.55 |
| 9          | 0.40                   | 0.20 | 0.41 | 0.39               | 0.20 | 0.40 | 0.32                      | 0.07 | 0.61 | 0.32               | 0.08 | 0.61 |
| 10         | 0.77                   | 0.00 | 0.23 | 0.76               | 0.00 | 0.24 | 0.52                      | 0.00 | 0.48 | 0.52               | 0.00 | 0.48 |
| 11         | 0.71                   | 0.09 | 0.21 | 0.71               | 0.09 | 0.20 | 0.43                      | 0.09 | 0.48 | 0.42               | 0.07 | 0.51 |
| 12         | 0.68                   | 0.13 | 0.19 | 0.70               | 0.12 | 0.19 | 0.40                      | 0.10 | 0.50 | 0.43               | 0.06 | 0.51 |
| 13         | 0.66                   | 0.17 | 0.17 | 0.67               | 0.17 | 0.16 | 0.41                      | 0.16 | 0.43 | 0.47               | 0.18 | 0.36 |
| 14         | 0.82                   | 0.09 | 0.09 | 0.81               | 0.10 | 0.09 | 0.49                      | 0.14 | 0.37 | 0.37               | 0.17 | 0.46 |
| 15         | 0.74                   | 0.11 | 0.14 | 0.73               | 0.12 | 0.15 | 0.68                      | 0.09 | 0.23 | 0.56               | 0.15 | 0.30 |
| 16         | 0.64                   | 0.14 | 0.22 | 0.63               | 0.14 | 0.23 | 0.40                      | 0.17 | 0.43 | 0.36               | 0.14 | 0.49 |
| 17         | 0.57                   | 0.15 | 0.27 | 0.58               | 0.15 | 0.27 | 0.46                      | 0.19 | 0.35 | 0.37               | 0.11 | 0.51 |
| 18         | 0.52                   | 0.17 | 0.31 | 0.53               | 0.16 | 0.31 | 0.32                      | 0.14 | 0.54 | 0.31               | 0.13 | 0.56 |
| 19         | 0.47                   | 0.19 | 0.34 | 0.47               | 0.19 | 0.34 | 0.37                      | 0.15 | 0.48 | 0.36               | 0.12 | 0.52 |
| 20         | 0.44                   | 0.19 | 0.37 | 0.44               | 0.20 | 0.37 | 0.29                      | 0.14 | 0.58 | 0.30               | 0.13 | 0.56 |
| 21         | 0.39                   | 0.20 | 0.41 | 0.39               | 0.20 | 0.40 | 0.31                      | 0.13 | 0.55 | 0.32               | 0.12 | 0.55 |

| Sample No. | Difference in surface and bulk atomic percentages (%) <sup>a)</sup> |     |     |                        |     |     | Difference in surface and bulk atomic percentages of samples prepared by quenched and slow cooling processes (%) <sup>b)</sup> |      |      |
|------------|---------------------------------------------------------------------|-----|-----|------------------------|-----|-----|--------------------------------------------------------------------------------------------------------------------------------|------|------|
|            | Quenched samples (C)                                                |     |     | Slow cooled sample (D) |     |     |                                                                                                                                |      |      |
|            | Mn                                                                  | Co  | Ni  | Mn                     | Co  | Ni  | Mn                                                                                                                             | Co   | Ni   |
| 1          | -38                                                                 | 0   | 236 | -53                    | 0   | 329 | 15                                                                                                                             | 0    | -93  |
| 2          | -34                                                                 | 50  | 136 | -47                    | -50 | 195 | 13                                                                                                                             | 0    | -59  |
| 3          | -45                                                                 | 350 | 91  | -58                    | 375 | 117 | 13                                                                                                                             | -25  | -26  |
| 4          | -34                                                                 | -17 | 89  | -48                    | 133 | 93  | 14                                                                                                                             | -150 | -2   |
| 5          | -52                                                                 | 27  | 97  | -65                    | 63  | 110 | 13                                                                                                                             | -36  | -13  |
| 6          | -32                                                                 | -11 | 59  | -46                    | -11 | 85  | 14                                                                                                                             | 0    | -26  |
| 7          | -22                                                                 | -45 | 45  | -39                    | -18 | 58  | 17                                                                                                                             | -27  | -13  |
| 8          | -17                                                                 | -38 | 32  | -19                    | -46 | 38  | 2                                                                                                                              | 8    | -6   |
| 9          | -20                                                                 | -65 | 49  | -18                    | -60 | 53  | -2                                                                                                                             | -5   | -4   |
| 10         | -32                                                                 | 0   | 109 | -32                    | 0   | 100 | 0                                                                                                                              | 0    | 9    |
| 11         | -39                                                                 | 0   | 129 | -41                    | -22 | 155 | 2                                                                                                                              | -2   | -26  |
| 12         | -41                                                                 | -23 | 163 | -39                    | -50 | 168 | -9                                                                                                                             | 27   | -5   |
| 13         | -38                                                                 | -6  | 153 | -30                    | 6   | 125 | -8                                                                                                                             | -12  | 28   |
| 14         | -40                                                                 | 56  | 311 | -54                    | 70  | 411 | 14                                                                                                                             | -14  | -100 |
| 15         | -8                                                                  | -18 | 64  | -23                    | 25  | 100 | 15                                                                                                                             | -43  | -36  |
| 16         | -38                                                                 | 21  | 95  | -43                    | 0   | 113 | 5                                                                                                                              | 21   | -18  |
| 17         | -19                                                                 | 27  | 30  | -36                    | -27 | 89  | 17                                                                                                                             | 54   | -59  |
| 18         | -38                                                                 | -15 | 74  | -42                    | -19 | 81  | 4                                                                                                                              | 4    | -7   |
| 19         | -21                                                                 | -21 | 41  | -23                    | -37 | 53  | 3                                                                                                                              | 16   | -12  |
| 20         | -34                                                                 | -26 | 57  | -32                    | -35 | 51  | -2                                                                                                                             | 9    | 6    |
| 21         | -21                                                                 | -35 | 34  | -18                    | -40 | 38  | -2                                                                                                                             | 5    | -4   |

a) Calculated as  $\{(B) - (A)/(A)\} \times 100$ .

b) Calculated as (C) - (D).

**Table S2** The refined structural parameters of LLO samples obtained from the Rietveld refinement with the space of  $C2/m$ . The LLO samples were prepared by (1) the quenched cooling with liquid nitrogen and (2) the slow cooling in the furnace at a controlled rate of  $25\text{ }^{\circ}\text{C h}^{-1}$ . Samples: 2 (A), 4 (B), 6 (C), 7 (D), 8 (E), 11 (F), 12 (G), 14 (H), 15 (I), 16 (J), 17 (K), 18 (L), 19 (M), 20 (N) and 21 (O).

(A-1)

| S=1.9770 R <sub>B</sub> =7.855 R <sub>F</sub> =6.173 R <sub>wp</sub> =15.152 |      |          |           |           |                        |  |
|------------------------------------------------------------------------------|------|----------|-----------|-----------|------------------------|--|
| a=4.9445(4) Å, b=8.5614(5) Å, c=5.0377(2) Å, β=109.211(5)°                   |      |          |           |           |                        |  |
| atom                                                                         | site | x        | y         | z         | occ <sub>refined</sub> |  |
| Li                                                                           | 2c   | 0        | 0         | 0.5       | 0.987(5)               |  |
| M                                                                            | 2c   | 0        | 0         | 0.5       | 0.013(5)               |  |
| Li                                                                           | 2b   | 0        | 0.5       | 0         | 0.633(5)               |  |
| M                                                                            | 2b   | 0        | 0.5       | 0         | 0.367(5)               |  |
| Li                                                                           | 4g   | 0        | 0.1663(2) | 0         | 0.044(5)               |  |
| M                                                                            | 4g   | 0        | 0.1663(2) | 0         | 0.956(5)               |  |
| Li                                                                           | 4h   | 0        | 0.675(2)  | 0.5       | 0.970(1)               |  |
| M                                                                            | 4h   | 0        | 0.675(2)  | 0.5       | 0.030(1)               |  |
| O                                                                            | 4i   | 0.234(1) | 0         | 0.2273(7) | 1                      |  |
| O                                                                            | 8j   | 0.254(1) | 0.3209(5) | 0.2395(7) | 1                      |  |

(A-2)

| S=1.7322 R <sub>B</sub> =5.035 R <sub>F</sub> =4.98 R <sub>wp</sub> =15.147 |      |          |           |           |                        |  |
|-----------------------------------------------------------------------------|------|----------|-----------|-----------|------------------------|--|
| a=4.9420(4) Å, b=8.5628(5) Å, c=5.0305(2) Å, β=108.985(5)°                  |      |          |           |           |                        |  |
| atom                                                                        | site | x        | y         | z         | occ <sub>refined</sub> |  |
| Li                                                                          | 2c   | 0        | 0         | 0.5       | 0.953(3)               |  |
| M                                                                           | 2c   | 0        | 0         | 0.5       | 0.047(3)               |  |
| Li                                                                          | 2b   | 0        | 0.5       | 0         | 0.673(2)               |  |
| M                                                                           | 2b   | 0        | 0.5       | 0         | 0.327(2)               |  |
| Li                                                                          | 4g   | 0        | 0.1663(2) | 0         | 0.054(2)               |  |
| M                                                                           | 4g   | 0        | 0.1663(2) | 0         | 0.946(2)               |  |
| Li                                                                          | 4h   | 0        | 0.675(2)  | 0.5       | 0.983(2)               |  |
| M                                                                           | 4h   | 0        | 0.675(2)  | 0.5       | 0.017(2)               |  |
| O                                                                           | 4i   | 0.237(2) | 0         | 0.2192(8) | 1                      |  |
| O                                                                           | 8j   | 0.265(3) | 0.3212(5) | 0.2306(8) | 1                      |  |

(B-1)

| S=1.6248 R <sub>B</sub> =2.445 R <sub>F</sub> =2.830 R <sub>wp</sub> =10.854 |      |          |           |           |                        |  |
|------------------------------------------------------------------------------|------|----------|-----------|-----------|------------------------|--|
| a=4.9499(2) Å, b=8.5784(3) Å, c=5.0253(1) Å, β=109.06(4)°                    |      |          |           |           |                        |  |
| atom                                                                         | site | x        | y         | z         | occ <sub>refined</sub> |  |
| Li                                                                           | 2c   | 0        | 0         | 0.5       | 0.964(5)               |  |
| M                                                                            | 2c   | 0        | 0         | 0.5       | 0.036(5)               |  |
| Li                                                                           | 2b   | 0        | 0.5       | 0         | 0.456(5)               |  |
| M                                                                            | 2b   | 0        | 0.5       | 0         | 0.543(5)               |  |
| Li                                                                           | 4g   | 0        | 0.1647(2) | 0         | 0.083(3)               |  |
| M                                                                            | 4g   | 0        | 0.1627(2) | 0         | 0.917(3)               |  |
| Li                                                                           | 4h   | 0        | 0.684(1)  | 0.5       | 0.976(3)               |  |
| M                                                                            | 4h   | 0        | 0.684(1)  | 0.5       | 0.024(3)               |  |
| O                                                                            | 4i   | 0.219(2) | 0         | 0.218(1)  | 1                      |  |
| O                                                                            | 8j   | 0.253(1) | 0.3177(6) | 0.2289(7) | 1                      |  |

(B-2)

| S=2.2912 R <sub>B</sub> =4.063 R <sub>F</sub> =4.279 R <sub>wp</sub> =14.476 |      |          |           |           |                        |  |
|------------------------------------------------------------------------------|------|----------|-----------|-----------|------------------------|--|
| a=4.93863(2) Å, b=8.55803(3) Å, c=5.02207(1) Å, β=109.012(4)°                |      |          |           |           |                        |  |
| atom                                                                         | site | x        | y         | z         | occ <sub>refined</sub> |  |
| Li                                                                           | 2c   | 0        | 0         | 0.5       | 0.964(5)               |  |
| M                                                                            | 2c   | 0        | 0         | 0.5       | 0.036(5)               |  |
| Li                                                                           | 2b   | 0        | 0.5       | 0         | 0.487(7)               |  |
| M                                                                            | 2b   | 0        | 0.5       | 0         | 0.513(7)               |  |
| Li                                                                           | 4g   | 0        | 0.1647(2) | 0         | 0.059(7)               |  |
| M                                                                            | 4g   | 0        | 0.1627(2) | 0         | 0.941(7)               |  |
| Li                                                                           | 4h   | 0        | 0.684(1)  | 0.5       | 0.965(3)               |  |
| M                                                                            | 4h   | 0        | 0.684(1)  | 0.5       | 0.035(3)               |  |
| O                                                                            | 4i   | 0.229(3) | 0         | 0.208(1)  | 1                      |  |
| O                                                                            | 8j   | 0.245(2) | 0.3178(8) | 0.2299(8) | 1                      |  |

(C-1)

| S=2.7191 R <sub>B</sub> =8.721 R <sub>F</sub> =5.573 R <sub>wp</sub> =16.498 |      |          |           |           |                        |  |
|------------------------------------------------------------------------------|------|----------|-----------|-----------|------------------------|--|
| a=4.95876(2) Å, b=8.56992(3) Å, c=5.01799(1) Å, β=109.2371(3)°               |      |          |           |           |                        |  |
| atom                                                                         | site | x        | y         | z         | occ <sub>refined</sub> |  |
| Li                                                                           | 2c   | 0        | 0         | 0.5       | 0.888(7)               |  |
| M                                                                            | 2c   | 0        | 0         | 0.5       | 0.112(7)               |  |
| Li                                                                           | 2b   | 0        | 0.5       | 0         | 0.284(7)               |  |
| M                                                                            | 2b   | 0        | 0.5       | 0         | 0.7158(7)              |  |
| Li                                                                           | 4g   | 0        | 0.1657(3) | 0         | 0.088(7)               |  |
| M                                                                            | 4g   | 0        | 0.1657(3) | 0         | 0.912(7)               |  |
| Li                                                                           | 4h   | 0        | 0.657(2)  | 0.5       | 0.975(5)               |  |
| M                                                                            | 4h   | 0        | 0.657(2)  | 0.5       | 0.025(5)               |  |
| O                                                                            | 4i   | 0.230(3) | 0         | 0.228(1)  | 1                      |  |
| O                                                                            | 8j   | 0.244(2) | 0.3184(8) | 0.2230(9) | 1                      |  |

(C-2)

| S=2.2164 R <sub>B</sub> =4.211 R <sub>F</sub> =4.576 R <sub>wp</sub> =14.085 |      |          |           |           |                        |  |
|------------------------------------------------------------------------------|------|----------|-----------|-----------|------------------------|--|
| a=4.9583(2) Å, b=8.5789(3) Å, c=5.0182(1) Å, β=109.241(3)°                   |      |          |           |           |                        |  |
| atom                                                                         | site | x        | y         | z         | occ <sub>refined</sub> |  |
| Li                                                                           | 2c   | 0        | 0         | 0.5       | 0.899(7)               |  |
| M                                                                            | 2c   | 0        | 0         | 0.5       | 0.101(7)               |  |
| Li                                                                           | 2b   | 0        | 0.5       | 0         | 0.260(7)               |  |
| M                                                                            | 2b   | 0        | 0.5       | 0         | 0.740(7)               |  |
| Li                                                                           | 4g   | 0        | 0.1657(3) | 0         | 0.071(7)               |  |
| M                                                                            | 4g   | 0        | 0.1657(3) | 0         | 0.929(7)               |  |
| Li                                                                           | 4h   | 0        | 0.657(2)  | 0.5       | 0.995(4)               |  |
| M                                                                            | 4h   | 0        | 0.657(2)  | 0.5       | 0.005(4)               |  |
| O                                                                            | 4i   | 0.233(2) | 0         | 0.230(6)  | 1                      |  |
| O                                                                            | 8j   | 0.245(2) | 0.3190(5) | 0.2242(8) | 1                      |  |

(D-1)

| S=1.9684 R <sub>B</sub> =3.0123 R <sub>F</sub> =3.692 R <sub>wp</sub> =12.268 |      |          |           |          |                        |  |
|-------------------------------------------------------------------------------|------|----------|-----------|----------|------------------------|--|
| a=4.9691(3) Å, b=8.5829(2) Å, c=5.0275(2) Å, β=109.226(4)°                    |      |          |           |          |                        |  |
| atom                                                                          | site | x        | y         | z        | occ <sub>refined</sub> |  |
| Li                                                                            | 2c   | 0        | 0         | 0.5      | 0.829(4)               |  |
| M                                                                             | 2c   | 0        | 0         | 0.5      | 0.171(4)               |  |
| Li                                                                            | 2b   | 0        | 0.5       | 0        | 0.283(5)               |  |
| M                                                                             | 2b   | 0        | 0.5       | 0        | 0.717(5)               |  |
| Li                                                                            | 4g   | 0        | 0.1639(4) | 0        | 0.096(5)               |  |
| M                                                                             | 4g   | 0        | 0.1639(4) | 0        | 0.904(5)               |  |
| Li                                                                            | 4h   | 0        | 0.643(1)  | 0.5      | 0.991(5)               |  |
| M                                                                             | 4h   | 0        | 0.643(1)  | 0.5      | 0.009(5)               |  |
| O                                                                             | 4i   | 0.218(2) | 0         | 0.224(1) | 1                      |  |
| O                                                                             | 8j   | 0.242(2) | 0.321(1)  | 0.228(1) | 1                      |  |

(D-2)

| S=1.7967 R <sub>B</sub> =3.543 R <sub>F</sub> =3.735 R <sub>wp</sub> =11.941 |      |          |           |          |                        |  |
|------------------------------------------------------------------------------|------|----------|-----------|----------|------------------------|--|
| a=4.966(3) Å, b=8.5808(2) Å, c=5.0265(2) Å, β=109.223(4)°                    |      |          |           |          |                        |  |
| atom                                                                         | site | x        | y         | z        | occ <sub>refined</sub> |  |
| Li                                                                           | 2c   | 0        | 0         | 0.5      | 0.871(1)               |  |
| M                                                                            | 2c   | 0        | 0         | 0.5      | 0.129(1)               |  |
| Li                                                                           | 2b   | 0        | 0.5       | 0        | 0.161(5)               |  |
| M                                                                            | 2b   | 0        | 0.5       | 0        | 0.839(5)               |  |
| Li                                                                           | 4g   | 0        | 0.1642(4) | 0        | 0.064(5)               |  |
| M                                                                            | 4g   | 0        | 0.1642(4) | 0        | 0.936(5)               |  |
| Li                                                                           | 4h   | 0        | 0.658(3)  | 0.5      | 0.994(5)               |  |
| M                                                                            | 4h   | 0        | 0.658(3)  | 0.5      | 0.006(5)               |  |
| O                                                                            | 4i   | 0.226(3) | 0         | 0.228(2) | 1                      |  |
| O                                                                            | 8j   | 0.248(2) | 0.324(1)  | 0.224(1) | 1                      |  |

(E-1)

| S=2.1748 R <sub>B</sub> =5.714 R <sub>F</sub> =4.502 R <sub>wp</sub> =14.475 |      |          |           |           |                        |  |
|------------------------------------------------------------------------------|------|----------|-----------|-----------|------------------------|--|
| a=4.9584(2) Å, b=8.5706(3) Å, c=5.0179(2) Å, β=109.234(5)°                   |      |          |           |           |                        |  |
| atom                                                                         | site | x        | y         | z         | occ <sub>refined</sub> |  |
| Li                                                                           | 2c   | 0        | 0         | 0.5       | 0.902(6)               |  |
| M                                                                            | 2c   | 0        | 0         | 0.5       | 0.098(6)               |  |
| Li                                                                           | 2b   | 0        | 0.5       | 0         | 0.250(6)               |  |
| M                                                                            | 2b   | 0        | 0.5       | 0         | 0.750(6)               |  |
| Li                                                                           | 4g   | 0        | 0.1639(4) | 0         | 0.092(6)               |  |
| M                                                                            | 4g   | 0        | 0.1639(4) | 0         | 0.908(6)               |  |
| Li                                                                           | 4h   | 0        | 0.673(1)  | 0.5       | 0.973(4)               |  |
| M                                                                            | 4h   | 0        | 0.673(1)  | 0.5       | 0.023(4)               |  |
| O                                                                            | 4i   | 0.224(3) | 0         | 0.217(1)  | 1                      |  |
| O                                                                            | 8j   | 0.254(2) | 0.324(1)  | 0.2271(8) | 1                      |  |

(E-2)

| S=1.6814 R <sub>B</sub> =2.781 R <sub>F</sub> =3.102 R <sub>wp</sub> =10.835 |      |          |           |           |                        |  |
|------------------------------------------------------------------------------|------|----------|-----------|-----------|------------------------|--|
| a=4.9581(3) Å, b=8.5811(4) Å, c=5.0269(2) Å, β=109.288(4)°                   |      |          |           |           |                        |  |
| atom                                                                         | site | x        | y         | z         | occ <sub>refined</sub> |  |
| Li                                                                           | 2c   | 0        | 0         | 0.5       | 0.895(7)               |  |
| M                                                                            | 2c   | 0        | 0         | 0.5       | 0.105(7)               |  |
| Li                                                                           | 2b   | 0        | 0.5       | 0         | 0.156(6)               |  |
| M                                                                            | 2b   | 0        | 0.5       | 0         | 0.844(6)               |  |
| Li                                                                           | 4g   | 0        | 0.1640(3) | 0         | 0.058(6)               |  |
| M                                                                            | 4g   | 0        | 0.1640(3) | 0         | 0.942(6)               |  |
| Li                                                                           | 4h   | 0        | 0.681(2)  | 0.5       | 0.991(4)               |  |
| M                                                                            | 4h   | 0        | 0.681(2)  | 0.5       | 0.009(4)               |  |
| O                                                                            | 4i   | 0.230(3) | 0         | 0.221(1)  | 1                      |  |
| O                                                                            | 8j   | 0.257(2) | 0.325(1)  | 0.2277(8) | 1                      |  |

(F-1)

| S=1.5881 R <sub>B</sub> =2.708 R <sub>F</sub> =2.785 R <sub>wp</sub> =11.532 |      |          |           |           |                        |  |
|------------------------------------------------------------------------------|------|----------|-----------|-----------|------------------------|--|
| a=4.9445(5) Å, b=8.5682(5) Å, c=5.0221(2) Å, β=109.030(5)°                   |      |          |           |           |                        |  |
| atom                                                                         | site | x        | y         | z         | occ <sub>refined</sub> |  |
| Li                                                                           | 2c   | 0        | 0         | 0.5       | 0.991(2)               |  |
| M                                                                            | 2c   | 0        | 0         | 0.5       | 0.009(2)               |  |
| Li                                                                           | 2b   | 0        | 0.5       | 0         | 0.516(5)               |  |
| M                                                                            | 2b   | 0        | 0.5       | 0         | 0.484(5)               |  |
| Li                                                                           | 4g   | 0        | 0.1647(2) | 0         | 0.090(5)               |  |
| M                                                                            | 4g   | 0        | 0.1647(2) | 0         | 0.910(5)               |  |
| Li                                                                           | 4h   | 0        | 0.677(1)  | 0.5       | 0.983(6)               |  |
| M                                                                            | 4h   | 0        | 0.677(1)  | 0.5       | 0.017(6)               |  |
| O                                                                            | 4i   | 0.226(1) | 0         | 0.2177(1) | 1                      |  |
| O                                                                            | 8j   | 0.258(1) | 0.3161(5) | 0.2286(6) | 1                      |  |

(F-2)

| S=1.6998 R <sub>B</sub> =3.925 R <sub>F</sub> =3.343 R <sub>wp</sub> =12.900 |      |          |           |           |                        |  |
|------------------------------------------------------------------------------|------|----------|-----------|-----------|------------------------|--|
| a=4.9459(3) Å, b=8.5663(3) Å, c=5.0224(2) Å, β=109.040(4)°                   |      |          |           |           |                        |  |
| atom                                                                         | site | x        | y         | z         | occ <sub>refined</sub> |  |
| Li                                                                           | 2c   | 0        | 0         | 0.5       | 0.980(4)               |  |
| M                                                                            | 2c   | 0        | 0         | 0.5       | 0.020(4)               |  |
| Li                                                                           | 2b   | 0        | 0.5       | 0         | 0.485(5)               |  |
| M                                                                            | 2b   | 0        | 0.5       | 0         | 0.515(5)               |  |
| Li                                                                           | 4g   | 0        | 0.1650(2) | 0         | 0.109(5)               |  |
| M                                                                            | 4g   | 0        | 0.1650(2) | 0         | 0.891(5)               |  |
| Li                                                                           | 4h   | 0        | 0.687(1)  | 0.5       | 0.977(2)               |  |
| M                                                                            | 4h   | 0        | 0.687(1)  | 0.5       | 0.023(6)               |  |
| O                                                                            | 4i   | 0.219(1) | 0         | 0.221(1)  | 1                      |  |
| O                                                                            | 8j   | 0.259(1) | 0.3155(5) | 0.2265(6) | 1                      |  |

(G-1)

| S=1.9752 R <sub>0</sub> =3.145 R <sub>F</sub> =3.399 R <sub>wp</sub> =10.348 |      |          |           |           |             |  |
|------------------------------------------------------------------------------|------|----------|-----------|-----------|-------------|--|
| a=4.9419(3) Å, b=8.5603(4) Å, c=5.0222(2) Å, β=109.023(4)°                   |      |          |           |           |             |  |
| atom                                                                         | site | x        | y         | z         | occ_refined |  |
| Li                                                                           | 2c   | 0        | 0         | 0.5       | 0.982(3)    |  |
| M                                                                            | 2c   | 0        | 0         | 0.5       | 0.018(3)    |  |
| Li                                                                           | 2b   | 0        | 0.5       | 0         | 0.498(4)    |  |
| M                                                                            | 2b   | 0        | 0.5       | 0         | 0.502(4)    |  |
| Li                                                                           | 4g   | 0        | 0.1647(2) | 0         | 0.040(4)    |  |
| M                                                                            | 4g   | 0        | 0.1647(2) | 0         | 0.960(4)    |  |
| Li                                                                           | 4h   | 0        | 0.677(1)  | 0.5       | 0.986(1)    |  |
| M                                                                            | 4h   | 0        | 0.677(1)  | 0.5       | 0.014(1)    |  |
| O                                                                            | 4i   | 0.222(1) | 0         | 0.216(1)  | 1           |  |
| O                                                                            | 8j   | 0.260(1) | 0.3152(4) | 0.2286(6) | 1           |  |

(G-2)

| S=1.7254 R <sub>0</sub> =5.384 R <sub>F</sub> =3.987 R <sub>wp</sub> =13.203 |      |          |           |           |             |  |
|------------------------------------------------------------------------------|------|----------|-----------|-----------|-------------|--|
| a=4.9488(4) Å, b=8.5593(5) Å, c=5.0240(2) Å, β=109.013(4)°                   |      |          |           |           |             |  |
| atom                                                                         | site | x        | y         | z         | occ_refined |  |
| Li                                                                           | 2c   | 0        | 0         | 0.5       | 0.988(5)    |  |
| M                                                                            | 2c   | 0        | 0         | 0.5       | 0.120(5)    |  |
| Li                                                                           | 2b   | 0        | 0.5       | 0         | 0.492(3)    |  |
| M                                                                            | 2b   | 0        | 0.5       | 0         | 0.508(3)    |  |
| Li                                                                           | 4g   | 0        | 0.1645(2) | 0         | 0.057(3)    |  |
| M                                                                            | 4g   | 0        | 0.1645(2) | 0         | 0.943(3)    |  |
| Li                                                                           | 4h   | 0        | 0.620(1)  | 0.5       | 0.978(3)    |  |
| M                                                                            | 4h   | 0        | 0.620(1)  | 0.5       | 0.022(3)    |  |
| O                                                                            | 4i   | 0.219(1) | 0         | 0.219(1)  | 1           |  |
| O                                                                            | 8j   | 0.261(1) | 0.3153(5) | 0.2254(7) | 1           |  |

(H-1)

| S=1.8946 R <sub>0</sub> =6.866 R <sub>F</sub> =7.029 R <sub>wp</sub> =15.094 |      |          |           |          |             |  |
|------------------------------------------------------------------------------|------|----------|-----------|----------|-------------|--|
| a=4.93891(3) Å, b=8.5486(5) Å, c=5.03268(3) Å, β=109.243(7)°                 |      |          |           |          |             |  |
| atom                                                                         | site | x        | y         | z        | occ_refined |  |
| Li                                                                           | 2c   | 0        | 0         | 0.5      | 0.961(3)    |  |
| M                                                                            | 2c   | 0        | 0         | 0.5      | 0.039(3)    |  |
| Li                                                                           | 2b   | 0        | 0.5       | 0        | 0.703(7)    |  |
| M                                                                            | 2b   | 0        | 0.5       | 0        | 0.257(7)    |  |
| Li                                                                           | 4g   | 0        | 0.1730(5) | 0        | 0.007(7)    |  |
| M                                                                            | 4g   | 0        | 0.1730(5) | 0        | 0.993(7)    |  |
| Li                                                                           | 4h   | 0        | 0.702(1)  | 0.5      | 0.986(2)    |  |
| M                                                                            | 4h   | 0        | 0.702(1)  | 0.5      | 0.014(2)    |  |
| O                                                                            | 4i   | 0.208(2) | 0         | 0.225(1) | 1           |  |
| O                                                                            | 8j   | 0.257(1) | 0.328(1)  | 0.222(1) | 1           |  |

(H-2)

| S=2.6486 R <sub>0</sub> =8.110 R <sub>F</sub> =8.745 R <sub>wp</sub> =18.415 |      |          |           |          |             |  |
|------------------------------------------------------------------------------|------|----------|-----------|----------|-------------|--|
| a=4.9321(5) Å, b=8.5369(5) Å, c=5.0241(3) Å, β=109.297(1)°                   |      |          |           |          |             |  |
| atom                                                                         | site | x        | y         | z        | occ_refined |  |
| Li                                                                           | 2c   | 0        | 0         | 0.5      | 0.930(1)    |  |
| M                                                                            | 2c   | 0        | 0         | 0.5      | 0.070(1)    |  |
| Li                                                                           | 2b   | 0        | 0.5       | 0        | 0.597(1)    |  |
| M                                                                            | 2b   | 0        | 0.5       | 0        | 0.413(1)    |  |
| Li                                                                           | 4g   | 0        | 0.1596(8) | 0        | 0.047(1)    |  |
| M                                                                            | 4g   | 0        | 0.1596(8) | 0        | 0.953(1)    |  |
| Li                                                                           | 4h   | 0        | 0.603(3)  | 0.5      | 0.975(5)    |  |
| M                                                                            | 4h   | 0        | 0.603(3)  | 0.5      | 0.025(5)    |  |
| O                                                                            | 4i   | 0.208(3) | 0         | 0.219(3) | 1           |  |
| O                                                                            | 8j   | 0.231(2) | 0.331(1)  | 0.216(1) | 1           |  |

(I-1)

| S=2.1849 R <sub>0</sub> =7.113 R <sub>F</sub> =8.315 R <sub>wp</sub> =14.453 |      |          |           |          |             |  |
|------------------------------------------------------------------------------|------|----------|-----------|----------|-------------|--|
| a=4.9398(2) Å, b=8.529(2) Å, c=5.03278(3) Å, β=109.224(6)°                   |      |          |           |          |             |  |
| atom                                                                         | site | x        | y         | z        | occ_refined |  |
| Li                                                                           | 2c   | 0        | 0         | 0.5      | 0.970(2)    |  |
| M                                                                            | 2c   | 0        | 0         | 0.5      | 0.030(2)    |  |
| Li                                                                           | 2b   | 0        | 0.5       | 0        | 0.637(3)    |  |
| M                                                                            | 2b   | 0        | 0.5       | 0        | 0.343(3)    |  |
| Li                                                                           | 4g   | 0        | 0.1739(7) | 0        | 0.037(3)    |  |
| M                                                                            | 4g   | 0        | 0.1739(7) | 0        | 0.963(3)    |  |
| Li                                                                           | 4h   | 0        | 0.714(3)  | 0.5      | 0.984(2)    |  |
| M                                                                            | 4h   | 0        | 0.714(3)  | 0.5      | 0.026(3)    |  |
| O                                                                            | 4i   | 0.213(2) | 0         | 0.226(3) | 1           |  |
| O                                                                            | 8j   | 0.257(2) | 0.341(1)  | 0.219(2) | 1           |  |

(I-2)

| S=2.4442 R <sub>0</sub> =13.576 R <sub>F</sub> =18.039 R <sub>wp</sub> =15.653 |      |          |           |          |             |  |
|--------------------------------------------------------------------------------|------|----------|-----------|----------|-------------|--|
| a=4.9393(4) Å, b=8.5402(2) Å, c=5.0311(3) Å, β=109.2497(1)°                    |      |          |           |          |             |  |
| atom                                                                           | site | x        | y         | z        | occ_refined |  |
| Li                                                                             | 2c   | 0        | 0         | 0.5      | 0.951(2)    |  |
| M                                                                              | 2c   | 0        | 0         | 0.5      | 0.049(2)    |  |
| Li                                                                             | 2b   | 0        | 0.5       | 0        | 0.532(1)    |  |
| M                                                                              | 2b   | 0        | 0.5       | 0        | 0.468(1)    |  |
| Li                                                                             | 4g   | 0        | 0.1733(7) | 0        | 0.044(1)    |  |
| M                                                                              | 4g   | 0        | 0.1733(7) | 0        | 0.956(1)    |  |
| Li                                                                             | 4h   | 0        | 0.718(2)  | 0.5      | 0.981(6)    |  |
| M                                                                              | 4h   | 0        | 0.718(2)  | 0.5      | 0.019(6)    |  |
| O                                                                              | 4i   | 0.219(3) | 0         | 0.222(3) | 1           |  |
| O                                                                              | 8j   | 0.245(2) | 0.346(1)  | 0.217(1) | 1           |  |

(J-1)

| S=2.591 R <sub>0</sub> =8.748 R <sub>F</sub> =7.008 R <sub>wp</sub> =21.632 |      |          |           |          |             |  |
|-----------------------------------------------------------------------------|------|----------|-----------|----------|-------------|--|
| a=4.9337(5) Å, b=8.5482(5) Å, c=5.0214(4) Å, β=109.0178(7)°                 |      |          |           |          |             |  |
| atom                                                                        | site | x        | y         | z        | occ_refined |  |
| Li                                                                          | 2c   | 0        | 0         | 0.5      | 0.949(3)    |  |
| M                                                                           | 2c   | 0        | 0         | 0.5      | 0.051(3)    |  |
| Li                                                                          | 2b   | 0        | 0.5       | 0        | 0.481(6)    |  |
| M                                                                           | 2b   | 0        | 0.5       | 0        | 0.519(6)    |  |
| Li                                                                          | 4g   | 0        | 0.1619(6) | 0        | 0.073(6)    |  |
| M                                                                           | 4g   | 0        | 0.1619(6) | 0        | 0.927(6)    |  |
| Li                                                                          | 4h   | 0        | 0.681(4)  | 0.5      | 0.976(2)    |  |
| M                                                                           | 4h   | 0        | 0.681(4)  | 0.5      | 0.024(2)    |  |
| O                                                                           | 4i   | 0.218(4) | 0         | 0.207(3) | 1           |  |
| O                                                                           | 8j   | 0.252(3) | 0.314(1)  | 0.231(1) | 1           |  |

(J-2)

| S=2.335 R <sub>0</sub> =6.400 R <sub>F</sub> =7.537 R <sub>wp</sub> =17.704 |      |          |           |          |             |  |
|-----------------------------------------------------------------------------|------|----------|-----------|----------|-------------|--|
| a=4.9367(2) Å, b=8.5548(3) Å, c=5.0183(2) Å, β=109.035(4)°                  |      |          |           |          |             |  |
| atom                                                                        | site | x        | y         | z        | occ_refined |  |
| Li                                                                          | 2c   | 0        | 0         | 0.5      | 0.963(6)    |  |
| M                                                                           | 2c   | 0        | 0         | 0.5      | 0.037(6)    |  |
| Li                                                                          | 2b   | 0        | 0.5       | 0        | 0.425(7)    |  |
| M                                                                           | 2b   | 0        | 0.5       | 0        | 0.575(7)    |  |
| Li                                                                          | 4g   | 0        | 0.1645(4) | 0        | 0.076(7)    |  |
| M                                                                           | 4g   | 0        | 0.1645(4) | 0        | 0.924(7)    |  |
| Li                                                                          | 4h   | 0        | 0.698(1)  | 0.5      | 0.974(3)    |  |
| M                                                                           | 4h   | 0        | 0.698(1)  | 0.5      | 0.026(3)    |  |
| O                                                                           | 4i   | 0.232(3) | 0         | 0.210(1) | 1           |  |
| O                                                                           | 8j   | 0.263(2) | 0.319(1)  | 0.225(1) | 1           |  |

(K-1)

| S=1.4651 R <sub>0</sub> =4.206 R <sub>F</sub> =4.379 R <sub>wp</sub> =12.996 |      |          |           |          |             |  |
|------------------------------------------------------------------------------|------|----------|-----------|----------|-------------|--|
| a=4.9425(2) Å, b=8.5664(3) Å, c=5.0217(2) Å, β=109.059(4)°                   |      |          |           |          |             |  |
| atom                                                                         | site | x        | y         | z        | occ_refined |  |
| Li                                                                           | 2c   | 0        | 0         | 0.5      | 0.951(8)    |  |
| M                                                                            | 2c   | 0        | 0         | 0.5      | 0.049(8)    |  |
| Li                                                                           | 2b   | 0        | 0.5       | 0        | 0.348(6)    |  |
| M                                                                            | 2b   | 0        | 0.5       | 0        | 0.652(6)    |  |
| Li                                                                           | 4g   | 0        | 0.1634(4) | 0        | 0.073(6)    |  |
| M                                                                            | 4g   | 0        | 0.1634(4) | 0        | 0.927(6)    |  |
| Li                                                                           | 4h   | 0        | 0.673(2)  | 0.5      | 0.972(5)    |  |
| M                                                                            | 4h   | 0        | 0.673(2)  | 0.5      | 0.038(5)    |  |
| O                                                                            | 4i   | 0.220(3) | 0         | 0.218(2) | 1           |  |
| O                                                                            | 8j   | 0.243(3) | 0.319(1)  | 0.225(1) | 1           |  |

(K-2)

| S=1.561 R <sub>0</sub> =2.705 R <sub>F</sub> =3.344 R <sub>wp</sub> =11.638 |      |          |           |           |             |  |
|-----------------------------------------------------------------------------|------|----------|-----------|-----------|-------------|--|
| a=4.9425(4) Å, b=8.5664(5) Å, c=5.02173(2) Å, β=109.059(5)°                 |      |          |           |           |             |  |
| atom                                                                        | site | x        | y         | z         | occ_refined |  |
| Li                                                                          | 2c   | 0        | 0         | 0.5       | 0.961(5)    |  |
| M                                                                           | 2c   | 0        | 0         | 0.5       | 0.039(5)    |  |
| Li                                                                          | 2b   | 0        | 0.5       | 0         | 0.358(3)    |  |
| M                                                                           | 2b   | 0        | 0.5       | 0         | 0.642(3)    |  |
| Li                                                                          | 4g   | 0        | 0.1645(3) | 0         | 0.052(3)    |  |
| M                                                                           | 4g   | 0        | 0.1645(3) | 0         | 0.948(3)    |  |
| Li                                                                          | 4h   | 0        | 0.674(2)  | 0.5       | 0.988(3)    |  |
| M                                                                           | 4h   | 0        | 0.674(2)  | 0.5       | 0.012(3)    |  |
| O                                                                           | 4i   | 0.242(2) | 0         | 0.215(1)  | 1           |  |
| O                                                                           | 8j   | 0.253(2) | 0.3243(8) | 0.2305(7) | 1           |  |

(L-1)

| S=1.7661 R <sub>0</sub> =3.607 R <sub>F</sub> =4.184 R <sub>wp</sub> =10.796 |      |          |           |           |             |  |
|------------------------------------------------------------------------------|------|----------|-----------|-----------|-------------|--|
| a=4.9588(2) Å, b=8.578(2) Å, c=5.0364(1) Å, β=109.248(3)°                    |      |          |           |           |             |  |
| atom                                                                         | site | x        | y         | z         | occ_refined |  |
| Li                                                                           | 2c   | 0        | 0         | 0.5       | 0.938(7)    |  |
| M                                                                            | 2c   | 0        | 0         | 0.5       | 0.062(7)    |  |
| Li                                                                           | 2b   | 0        | 0.5       | 0         | 0.266(6)    |  |
| M                                                                            | 2b   | 0        | 0.5       | 0         | 0.734(6)    |  |
| Li                                                                           | 4g   | 0        | 0.1636(4) | 0         | 0.065(6)    |  |
| M                                                                            | 4g   | 0        | 0.1636(4) | 0         | 0.935(6)    |  |
| Li                                                                           | 4h   | 0        | 0.670(3)  | 0.5       | 0.969(4)    |  |
| M                                                                            | 4h   | 0        | 0.670(3)  | 0.5       | 0.031(4)    |  |
| O                                                                            | 4i   | 0.217(2) | 0         | 0.211(1)  | 1           |  |
| O                                                                            | 8j   | 0.248(2) | 0.324(1)  | 0.2280(9) | 1           |  |

(L-2)

| S=1.6546 R <sub>0</sub> =2.404 R <sub>F</sub> =3.333 R <sub>wp</sub> =9.645 |      |          |           |           |             |  |
|-----------------------------------------------------------------------------|------|----------|-----------|-----------|-------------|--|
| a=4.95636(2) Å, b=8.5793(2) Å, c=5.0279(1) Å, β=109.266(2)°                 |      |          |           |           |             |  |
| atom                                                                        | site | x        | y         | z         | occ_refined |  |
| Li                                                                          | 2c   | 0        | 0         | 0.5       | 0.950(7)    |  |
| M                                                                           | 2c   | 0        | 0         | 0.5       | 0.050(7)    |  |
| Li                                                                          | 2b   | 0        | 0.5       | 0         | 0.296(5)    |  |
| M                                                                           | 2b   | 0        | 0.5       | 0         | 0.704(5)    |  |
| Li                                                                          | 4g   | 0        | 0.1646(4) | 0         | 0.050(5)    |  |
| M                                                                           | 4g   | 0        | 0.1646(4) | 0         | 0.950(5)    |  |
| Li                                                                          | 4h   | 0        | 0.674(2)  | 0.5       | 0.981(4)    |  |
| M                                                                           | 4h   | 0        | 0.674(2)  | 0.5       | 0.019(6)    |  |
| O                                                                           | 4i   | 0.229(2) | 0         | 0.216(1)  | 1           |  |
| O                                                                           | 8j   | 0.252(2) | 0.332(1)  | 0.2275(7) | 1           |  |

(M-1)

| S=1.8144 R <sub>B</sub> =3.613 R <sub>F</sub> =4.001 R <sub>wp</sub> =13.727 |      |          |           |          |                        |  |
|------------------------------------------------------------------------------|------|----------|-----------|----------|------------------------|--|
| a=4.9663(2) Å, b=8.5708(3) Å, c=5.0293(1) Å, β=109.206(3) °                  |      |          |           |          |                        |  |
| atom                                                                         | site | x        | y         | z        | occ <sub>refined</sub> |  |
| Li                                                                           | 2c   | 0        | 0         | 0.5      | 0.877(7)               |  |
| M                                                                            | 2c   | 0        | 0         | 0.5      | 0.123(7)               |  |
| Li                                                                           | 2b   | 0        | 0.5       | 0        | 0.169(8)               |  |
| M                                                                            | 2b   | 0        | 0.5       | 0        | 0.831(8)               |  |
| Li                                                                           | 4g   | 0        | 0.1650(6) | 0        | 0.087(8)               |  |
| M                                                                            | 4g   | 0        | 0.1650(6) | 0        | 0.913(8)               |  |
| Li                                                                           | 4h   | 0        | 0.656(3)  | 0.5      | 0.975(8)               |  |
| M                                                                            | 4h   | 0        | 0.656(3)  | 0.5      | 0.025(8)               |  |
| O                                                                            | 4i   | 0.227(3) | 0         | 0.228(2) | 1                      |  |
| O                                                                            | 8j   | 0.246(2) | 0.323(1)  | 0.223(1) | 1                      |  |

(M-2)

| S=1.7835 R <sub>B</sub> =3.319 R <sub>F</sub> =3.612 R <sub>wp</sub> =13.051 |      |          |           |          |                        |  |
|------------------------------------------------------------------------------|------|----------|-----------|----------|------------------------|--|
| a=4.9661(2) Å, b=8.5709(3) Å, c=5.0293(2) Å, β=109.2057(4) °                 |      |          |           |          |                        |  |
| atom                                                                         | site | x        | y         | z        | occ <sub>refined</sub> |  |
| Li                                                                           | 2c   | 0        | 0         | 0.5      | 0.933(4)               |  |
| M                                                                            | 2c   | 0        | 0         | 0.5      | 0.067(4)               |  |
| Li                                                                           | 2b   | 0        | 0.5       | 0        | 0.187(7)               |  |
| M                                                                            | 2b   | 0        | 0.5       | 0        | 0.813(7)               |  |
| Li                                                                           | 4g   | 0        | 0.1656(5) | 0        | 0.065(7)               |  |
| M                                                                            | 4g   | 0        | 0.1656(5) | 0        | 0.945(7)               |  |
| Li                                                                           | 4h   | 0        | 0.641(2)  | 0.5      | 0.982(5)               |  |
| M                                                                            | 4h   | 0        | 0.641(2)  | 0.5      | 0.018(5)               |  |
| O                                                                            | 4i   | 0.233(3) | 0         | 0.232(2) | 1                      |  |
| O                                                                            | 8j   | 0.246(2) | 0.323(1)  | 0.219(1) | 1                      |  |

(N-1)

| S=1.9049 R <sub>B</sub> =3.435 R <sub>F</sub> =4.115 R <sub>wp</sub> =11.764 |      |          |           |          |                        |  |
|------------------------------------------------------------------------------|------|----------|-----------|----------|------------------------|--|
| a=4.9722(2) Å, b=8.5838(3) Å, c=5.0323(1) Å, β=109.212(3) °                  |      |          |           |          |                        |  |
| atom                                                                         | site | x        | y         | z        | occ <sub>refined</sub> |  |
| Li                                                                           | 2c   | 0        | 0         | 0.5      | 0.892(6)               |  |
| M                                                                            | 2c   | 0        | 0         | 0.5      | 0.108(6)               |  |
| Li                                                                           | 2b   | 0        | 0.5       | 0        | 0.227(7)               |  |
| M                                                                            | 2b   | 0        | 0.5       | 0        | 0.773(7)               |  |
| Li                                                                           | 4g   | 0        | 0.1646(6) | 0        | 0.113(7)               |  |
| M                                                                            | 4g   | 0        | 0.1646(6) | 0        | 0.887(7)               |  |
| Li                                                                           | 4h   | 0        | 0.667(3)  | 0.5      | 0.977(1)               |  |
| M                                                                            | 4h   | 0        | 0.667(3)  | 0.5      | 0.023(1)               |  |
| O                                                                            | 4i   | 0.231(3) | 0         | 0.216(2) | 1                      |  |
| O                                                                            | 8j   | 0.246(2) | 0.3266(5) | 0.223(1) | 1                      |  |

(N-2)

| S=1.6762 R <sub>B</sub> =2.176 R <sub>F</sub> =2.415 R <sub>wp</sub> =10.492 |      |          |           |          |                        |  |
|------------------------------------------------------------------------------|------|----------|-----------|----------|------------------------|--|
| a=4.9706(2) Å, b=8.6195(3) Å, c=5.0394(1) Å, β=109.116(3) °                  |      |          |           |          |                        |  |
| atom                                                                         | site | x        | y         | z        | occ <sub>refined</sub> |  |
| Li                                                                           | 2c   | 0        | 0         | 0.5      | 0.948(8)               |  |
| M                                                                            | 2c   | 0        | 0         | 0.5      | 0.052(8)               |  |
| Li                                                                           | 2b   | 0        | 0.5       | 0        | 0.124(4)               |  |
| M                                                                            | 2b   | 0        | 0.5       | 0        | 0.876(4)               |  |
| Li                                                                           | 4g   | 0        | 0.1672(4) | 0        | 0.069(4)               |  |
| M                                                                            | 4g   | 0        | 0.1672(4) | 0        | 0.931(4)               |  |
| Li                                                                           | 4h   | 0        | 0.684(2)  | 0.5      | 0.970(5)               |  |
| M                                                                            | 4h   | 0        | 0.684(2)  | 0.5      | 0.030(5)               |  |
| O                                                                            | 4i   | 0.231(3) | 0         | 0.223(2) | 1                      |  |
| O                                                                            | 8j   | 0.243(2) | 0.333(1)  | 0.226(1) | 1                      |  |

(O-1)

| S=1.7518 R <sub>B</sub> =4.646 R <sub>F</sub> =4.903 R <sub>wp</sub> =15.551 |      |          |           |          |                        |  |
|------------------------------------------------------------------------------|------|----------|-----------|----------|------------------------|--|
| a=4.9720(3) Å, b=8.6141(4) Å, c=5.034(2) Å, β=109.145(4) °                   |      |          |           |          |                        |  |
| atom                                                                         | site | x        | y         | z        | occ <sub>refined</sub> |  |
| Li                                                                           | 2c   | 0        | 0         | 0.5      | 0.888(2)               |  |
| M                                                                            | 2c   | 0        | 0         | 0.5      | 0.112(2)               |  |
| Li                                                                           | 2b   | 0        | 0.5       | 0        | 0.126(9)               |  |
| M                                                                            | 2b   | 0        | 0.5       | 0        | 0.874(9)               |  |
| Li                                                                           | 4g   | 0        | 0.1655(6) | 0        | 0.022(9)               |  |
| M                                                                            | 4g   | 0        | 0.1655(6) | 0        | 0.978(9)               |  |
| Li                                                                           | 4h   | 0        | 0.667(4)  | 0.5      | 0.971(1)               |  |
| M                                                                            | 4h   | 0        | 0.667(4)  | 0.5      | 0.029(1)               |  |
| O                                                                            | 4i   | 0.233(5) | 0         | 0.231(4) | 1                      |  |
| O                                                                            | 8j   | 0.241(4) | 0.323(1)  | 0.220(2) | 1                      |  |

(O-2)

| S=1.8947 R <sub>B</sub> =3.802 R <sub>F</sub> =4.218 R <sub>wp</sub> =14.410 |      |          |           |          |                        |  |
|------------------------------------------------------------------------------|------|----------|-----------|----------|------------------------|--|
| a=4.9687(2) Å, b=8.614(3) Å, c=5.0296(1) Å, β=109.1799(4) °                  |      |          |           |          |                        |  |
| atom                                                                         | site | x        | y         | z        | occ <sub>refined</sub> |  |
| Li                                                                           | 2c   | 0        | 0         | 0.5      | 0.932(5)               |  |
| M                                                                            | 2c   | 0        | 0         | 0.5      | 0.068(5)               |  |
| Li                                                                           | 2b   | 0        | 0.5       | 0        | 0.076(9)               |  |
| M                                                                            | 2b   | 0        | 0.5       | 0        | 0.924(9)               |  |
| Li                                                                           | 4g   | 0        | 0.1670(8) | 0        | 0.049(9)               |  |
| M                                                                            | 4g   | 0        | 0.1670(8) | 0        | 0.951(9)               |  |
| Li                                                                           | 4h   | 0        | 0.667(6)  | 0.5      | 0.970(3)               |  |
| M                                                                            | 4h   | 0        | 0.667(6)  | 0.5      | 0.030(3)               |  |
| O                                                                            | 4i   | 0.228(4) | 0         | 0.234(4) | 1                      |  |
| O                                                                            | 8j   | 0.238(4) | 0.326(2)  | 0.219(2) | 1                      |  |
